# Supplementary material for: Changes in physical activity and sedentary behaviours from before to during the COVID-19 pandemic lockdown: a systematic review
Source: PubMed Central journal article supplement — BMJ Open Sport Exerc Med. 2021 Feb 1;7(1):e000960. doi: 10.1136/bmjsem-2020-000960 (PMC7852071; doi:10.1136/bmjsem-2020-000960), 2021-02-01
Supplement: bmjsem-2020-000960supp001.pdf [file bmjsem-2020-000960supp001.pdf]

**Supplementary Table 1: Database search strategy**

| Database                                                         | Search terms                                                                                                                                                                                                                                                                                                                                                                                                                                                                                                                                                                                                                                     |
|------------------------------------------------------------------|--------------------------------------------------------------------------------------------------------------------------------------------------------------------------------------------------------------------------------------------------------------------------------------------------------------------------------------------------------------------------------------------------------------------------------------------------------------------------------------------------------------------------------------------------------------------------------------------------------------------------------------------------|
| <b>Pubmed</b>                                                    | ((COVID-19[Title/Abstract] OR "Novel Coronavirus"[Title/Abstract] OR "2019 novel coronavirus"[Title/Abstract] OR 2019-nCoV[Title/Abstract] OR SARS-CoV-2[Title/Abstract]) AND (isolation[Title/Abstract] OR lock*[Title/Abstract] OR self-isolation[Title/Abstract])) AND ("Physical activity"[Title/Abstract] OR exercise[Title/Abstract] OR walking[Title/Abstract] OR running[Title/Abstract] OR cycling[Title/Abstract] OR swimming[Title/Abstract] OR sports[Title/Abstract] OR sedentary[Title/Abstract] OR "sedentary behaviour"[Title/Abstract] OR activity[Title/Abstract] OR "screen time"[Title/Abstract] OR sitting[Title/Abstract]) |
| <b>CINAHL, PSYCInfo and SPORTdiscus (searched via EBSCOHOST)</b> | Title and abstract:<br>((COVID-19 OR "Novel Coronavirus" OR "2019 novel coronavirus" OR 2019-nCoV OR SARS-CoV-2) AND (isolation OR lock* OR self-isolation) AND ("Physical activity" OR exercise OR walking OR running OR cycling OR swimming OR sports OR sedentary OR "sedentary behaviour" OR activity OR "screen time" OR sitting))                                                                                                                                                                                                                                                                                                          |
| <b>Embase (searched via OVID)</b>                                | Title and abstract:<br>((COVID-19 OR Novel Coronavirus OR 2019 novel coronavirus OR 2019-nCoV OR SARS-CoV-2) AND (isolation OR lock* OR self-isolation) AND (Physical activity OR exercise OR walking OR running OR cycling OR swimming OR sports OR sedentary OR sedentary behaviour OR activity OR screen time OR sitting))                                                                                                                                                                                                                                                                                                                    |
| <b>Social Sciences Citation Index</b>                            | Topic (title, abstract, keyword, and keyword plus)<br>((COVID-19 OR "Novel Coronavirus" OR "2019 novel coronavirus" OR 2019-nCoV OR SARS-CoV-2) AND (isolation OR lock* OR self-isolation) AND ("Physical activity" OR exercise OR walking OR running OR cycling OR swimming OR sports OR sedentary OR "sedentary behaviour" OR activity OR "screen time" OR sitting))                                                                                                                                                                                                                                                                           |
| <b>Cochrane</b>                                                  | Title, abstract and keyword<br>((COVID-19 OR "Novel Coronavirus" OR "2019 novel coronavirus" OR 2019-nCoV OR SARS-CoV-2) AND (isolation OR lock* OR self-isolation) AND ("Physical activity" OR exercise OR walking OR running OR cycling OR swimming OR sports OR sedentary OR "sedentary behaviour" OR activity OR "screen time" OR sitting))                                                                                                                                                                                                                                                                                                  |
| <b>Scopus</b>                                                    | Title, abstract and keyword<br>((COVID-19 OR "Novel Coronavirus" OR "2019 novel coronavirus" OR 2019-nCoV OR SARS-CoV-2) AND (isolation OR lock* OR self-isolation) AND ("Physical activity" OR exercise OR walking OR running OR cycling OR swimming OR sports OR sedentary OR "sedentary behaviour" OR activity OR "screen time" OR sitting))                                                                                                                                                                                                                                                                                                  |
| <b>Opengrey</b>                                                  | ((COVID-19 OR "Novel Coronavirus" OR "2019 novel coronavirus" OR 2019-nCoV OR SARS-CoV-2) AND (isolation OR lock* OR self-isolation) AND ("Physical activity" OR exercise OR walking OR running OR cycling OR swimming OR sports OR sedentary OR "sedentary behaviour" OR activity OR "screen time" OR sitting))                                                                                                                                                                                                                                                                                                                                 |

**Supplementary Table 2: Details of excluded studies based on ethical approval**

| Author                                 | Title                                                                                                                                                | Study Location                                                                                                                                              |
|----------------------------------------|------------------------------------------------------------------------------------------------------------------------------------------------------|-------------------------------------------------------------------------------------------------------------------------------------------------------------|
| Barchetta, et al. (2020)               | Effects of work status changes and perceived stress on glycaemic control in individuals with type 1 diabetes during COVID-19 lockdown in Italy.      | Italy                                                                                                                                                       |
| Barone et al. (2020)                   | The impact of COVID-19 on people with diabetes in Brazil                                                                                             | Brazil                                                                                                                                                      |
| Barrea et al (2020)                    | Does Sars-Cov-2 threaten our dreams? Effect of quarantine on sleep quality and body mass index                                                       | Italy                                                                                                                                                       |
| Brand, Timme, and Nosrat, Sanaz (2020) | When Pandemic Hits: Exercise Frequency and Subjective Well-Being During COVID-19 Pandemic                                                            | Global - Austria, Brazil, China, Finland, Germany, Greece, Iceland, Iran, Italy, Malaysia, Philippines, Russia, Spain, Switzerland, Taiwan, Turkey, UK, USA |
| Cacioppo et al (2020)                  | Emerging health challenges for children with physical disabilities and their parents during the COVID-19 pandemic: The ECHO French survey            | France                                                                                                                                                      |
| Capaldo et al (2020)                   | Blood Glucose Control During Lockdown for COVID-19: CGM Metrics in Italian Adults With Type 1 Diabetes.                                              | Italy                                                                                                                                                       |
| Chouchou et al (2020)                  | The importance of sleep and physical activity on well-being during COVID-19 lockdown: reunion island as a case study.                                | Reunion Island                                                                                                                                              |
| Cransac-Miet et al (2020)              | Impact of COVID-19 lockdown on lifestyle adherence in stay-at-home patients with chronic coronary syndromes: Towards a time bomb.                    | France                                                                                                                                                      |
| de Haas, Faber, and Hamersma (2020)    | How COVID-19 and the Dutch 'intelligent lockdown' change activities, work and travel behaviour: Evidence from longitudinal data in the Netherlands   | The Netherlands                                                                                                                                             |
| Di Renzo et al (2020)                  | Eating habits and lifestyle changes during COVID-19 lockdown: an Italian survey                                                                      | Italy                                                                                                                                                       |
| Jelaca et al (2020)                    | A REPORT ON THE IMPACTS OF THE CORONAVIRUS SARS-COV-2 SHELTER-IN-PLACE ORDER" ON FITNESS AND WELL-BEING.                                             | USA                                                                                                                                                         |
| Gornicka et al (2020)                  | Dietary and Lifestyle Changes During COVID-19 and the Subsequent Lockdowns among Polish Adults: A Cross-Sectional Online Survey PLifeCOVID-19 Study. | Poland                                                                                                                                                      |
| Khader and Jabeen (2020)               | A cross sectional study reveals severe disruption in glycemic control in people with diabetes during and after lockdown in India                     | India                                                                                                                                                       |
| Mutz and Gerke (2020)                  | Sport and exercise in times of self-quarantine: How Germans changed their behaviour at the beginning of the Covid-19 pandemic                        | Germany                                                                                                                                                     |
| Pepin et al (2020)                     | Wearable Activity Trackers for Monitoring Adherence to Home Confinement During the COVID-19 Pandemic Worldwide: Data Aggregation and Analysis.       | Global - Australia, Canada, China, France, Germany, Ireland, Italy, Japan, Netherlands, Singapore, Spain, Sweden, Switzerland, UK, USA                      |
| Radtke et al (2020)                    | Recommended shielding against COVID-19 impacts physical activity levels in adults with cystic fibrosis                                               | Switzerland                                                                                                                                                 |

|                            |                                                                                                                                                   |       |
|----------------------------|---------------------------------------------------------------------------------------------------------------------------------------------------|-------|
| Rastogi and Hiteshi (2020) | Improved glyceimic control amongst people with long-standing diabetes during COVID-19 lockdown: a prospective, observational, nested cohort study | India |
| Sassone et al (2020)       | Impact of COVID-19 Pandemic on Physical Activity in Patients With Implantable Cardioverter-Defibrillators                                         | NR    |
| Verma et al (2020)         | Impact of lockdown in COVID 19 on glyceimic control in patients with type 1 Diabetes Mellitus                                                     | NR    |
| Zhang et al (2020)         | Emotional eating in pregnant women during the covid-19 pandemic and its association with dietary intake and gestational weight gain               | China |

Supplementary Table 3: Characteristics of included studies

| Author                 | Study design    | Country      | Population               | Total participants | Age Range | Age Mean (SD) | Sex % Female | Physical activity measurement tool        | Sedentary behaviour measurement tool | Total NOS score | Description of lockdown*                                                                                                                                                                                                                                                                                                                                                                                                                                                                                                        |
|------------------------|-----------------|--------------|--------------------------|--------------------|-----------|---------------|--------------|-------------------------------------------|--------------------------------------|-----------------|---------------------------------------------------------------------------------------------------------------------------------------------------------------------------------------------------------------------------------------------------------------------------------------------------------------------------------------------------------------------------------------------------------------------------------------------------------------------------------------------------------------------------------|
| Ammar et al (2020)     | Cross-sectional | Global       | Adults - general         | 1047               | 18+       | NR            | 53.8         | IPAQ                                      | IPAQ                                 | 6               | Unspecified 'confinement conditions'                                                                                                                                                                                                                                                                                                                                                                                                                                                                                            |
| Asiamah et al (2020)   | Cross-sectional | Ghana        | Adults - General         | 621                | 18-64     | NR            | 35           | Questionnaire - not validated             | Questionnaire - not validated        | 5               | 'The enforcement of social distancing protocols in affected regions'                                                                                                                                                                                                                                                                                                                                                                                                                                                            |
| Assaloni et al (2020)  | Observational   | NR           | Adults - Type 1 diabetes | 154                | NR        | 44.8 (12.5)   | 45.50        | Godin-Leisure Time Exercise questionnaire | None                                 | 5               | 'National Quarantine'                                                                                                                                                                                                                                                                                                                                                                                                                                                                                                           |
| Barwais (2020)         | Cross-sectional | Saudi Arabia | Adults - General         | 244                | 18-50     | 33.8 (7.7)    | 36.90        | IPAQ-SF                                   | None                                 | 5               | 'Imposed a 24-hour curfew on the cities of Mecca and Medina, with limited exceptions for safety and life. All schools and universities were also closed, international and domestic flights were suspended, and attendance at workplaces in all government and private sector businesses was prohibited. In addition, all malls, markets, restaurants, and gatherings on beaches were forbidden [5]. The KSA also suspended sporting activities, events, and competitions, including those at private sports halls and centres' |
| Bivi-Roig et al (2020) | Cross-sectional | Spain        | Adults - Pregnant women  | 90                 | NR        | 33.1 (4.6)    | 100          | Questionnaire - not validated             | Questionnaire - not validated        | 5               | 'Strict confinement'                                                                                                                                                                                                                                                                                                                                                                                                                                                                                                            |
| Bourdas et al (2020a)  | Cross-sectional | Greece       | Adults - General         | 8495               | NR        | 37.2 (0.2)    | 61.7         | Active-Q                                  | None                                 | 4               | 'Movement outside of the house was permitted only for specific reasons, that including moving to or from the workplace, shopping for food or medicine, visiting a doctor or assisting a person in need for                                                                                                                                                                                                                                                                                                                      |

|                            |                            |                  |                                                            |      |       |               |       |                                                                   |      |   |                                                                                                                                                                                                                                                                                                                                                    |
|----------------------------|----------------------------|------------------|------------------------------------------------------------|------|-------|---------------|-------|-------------------------------------------------------------------|------|---|----------------------------------------------------------------------------------------------------------------------------------------------------------------------------------------------------------------------------------------------------------------------------------------------------------------------------------------------------|
|                            |                            |                  |                                                            |      |       |               |       |                                                                   |      |   | help, and exercising outside individually or in pairs.'                                                                                                                                                                                                                                                                                            |
| Bourdas et al (2020b)      | longitudinal observational | Greece           | Adults - General                                           | 1015 | NR    | 40.33 (0.41)  | 57.44 | Active-Q                                                          | NR   | 6 | NR                                                                                                                                                                                                                                                                                                                                                 |
| Bowes et al (2020)         | Cross-sectional            | Global - (UK94%) | Adults - Elite Sport                                       | 95   | 18-34 | NR            | 100   | Questionnaire - not validated                                     | None | 5 | NR                                                                                                                                                                                                                                                                                                                                                 |
| Branley-Bell et al (2020)  | Cross-sectional            | UK               | Over 16 years of age with experience of an eating disorder | 129  | 16-65 | 29.27 (38.99) | 93.8  | Questionnaire - not validated                                     | NR   | 3 | NR                                                                                                                                                                                                                                                                                                                                                 |
| Buoite Stella et al (2020) | Cross-sectional            | Italy            | Adults - General                                           | 400  | NR    | 35 (15)       | 69    | IPAQ-SF and Smartphone accelerometer or consumer activity tracker | None | 4 | 'The Italian government enacted a national lockdown restricting the movement of the population except for necessity, work, and health circumstances. Most of the population stayed at home for most of the time. In particular, outdoor physical activity (PA) was prohibited, while gym and sport clubs were closed as per governmental measures' |
| Callow et al (2020)        | Cross-sectional            | USA and Canada   | Adults - General                                           | 1046 | 50+   | NR            | 80    | Questionnaire - not validated                                     | None | 5 | NR                                                                                                                                                                                                                                                                                                                                                 |
| Cancello et al (2020)      | Cross-sectional            | Italy            | Adults - General                                           | 492  | 18+   | NR            | 84    | Questionnaire - not validated                                     | None | 5 | 'The containment measures limited people leave the house only for urgent needs only such as shopping for foods and serious health reasons and most working subjects converted the habitual occupation into "at home" smart working.'                                                                                                               |
| Caruso et al (2020)        | Observational              | Italy            | Adults - Type 1 diabetes                                   | 48   | NR    | 42.4 (15.9)   | 47.9  | Questionnaire - not validated                                     | None | 4 | 'People were not allowed to leave their houses except for urgent necessity, and all non-essential businesses were forced to close with employees                                                                                                                                                                                                   |

|                                     |                            |         |                                                                     |       |       |               |      |                                                                         |                               |   |                                                                                                                                                                                                                          |
|-------------------------------------|----------------------------|---------|---------------------------------------------------------------------|-------|-------|---------------|------|-------------------------------------------------------------------------|-------------------------------|---|--------------------------------------------------------------------------------------------------------------------------------------------------------------------------------------------------------------------------|
|                                     |                            |         |                                                                     |       |       |               |      |                                                                         |                               |   | being either put on furlough or home working.'                                                                                                                                                                           |
| Castaneda-Babarro Coca et al (2020) | Cross-sectional            | Spain   | Adults - General                                                    | 3800  | 18-65 | 42.7 (10.4)   | 46   | IPAQ-SF                                                                 | IPAQ-SF                       | 3 | 'a lockdown to restrict travel and cancel non-essential services in order to stop the spread of coronavirus disease'                                                                                                     |
| Castellini et al (2020)             | Longitudinal observational | Italy   | Adults - FEMALE with Anorexia Nervosa (AN) and Bulimia Nervosa (BN) | 171   | NR    | 31.74 (12.76) | 100  | EDE-Q                                                                   | None                          | 5 | 'the national and regional governments imposed a progressively increasing level of isolation, with the final general lockdown on March ninth'                                                                            |
| Constandt et al (2020a)             | Cross-sectional            | Belgium | Adults - General                                                    | 11763 | 18-74 | NR            | 47.4 | Ordinal question: exercising more, exercising the same, exercising less | Questionnaire - not validated | 6 | 'Schools were closed, and working from home became the new standard whenever possible. Furthermore, citizens were allowed and even encouraged by the government to exercise, but with considerable restrictions.'        |
| Constant et al (2020b)              | Cross-sectional            | France  | Adults - General                                                    | 4005  | NR    | NR            | 55.4 | Questionnaire - not validated                                           | Questionnaire - not validated | 7 | 'Nationwide confinement, the restriction of individuals to their homes, was one of the measures enforced in many countries, including France on March 17, 2020'                                                          |
| Di Corrado et al (2020)             | Cross-sectional            | Italy   | Adults - General                                                    | 367   | 17-73 | 33.35 (12.8)  | 49   | Questionnaire - not validated                                           | None                          | 4 | 'Governments' immediate protective restrictions included full lockdowns of cities, travel, restricted social congregations, including sports events, concerts, restaurants, and the closing of schools and universities' |
| Di Stefano et al (2020)             | Cross-sectional            | Sicily  | Adults - Neuromuscular Disease                                      | 149   | NR    | 57.3 (13.7)   | 38   | IPAQ-SF                                                                 | None                          | 3 | 'It is well-known that in this period, due to the restrictive measures adopted by the government, all sports facilities were closed and the practice of outdoor PA in public parks and gardens was forbidden'            |

|                                 |                    |         |                                         |      |       |                         |      |                               |                               |   |                                                                                                                                                                                                                                                                                                                                                                                                                                                                                                                                                                                                       |
|---------------------------------|--------------------|---------|-----------------------------------------|------|-------|-------------------------|------|-------------------------------|-------------------------------|---|-------------------------------------------------------------------------------------------------------------------------------------------------------------------------------------------------------------------------------------------------------------------------------------------------------------------------------------------------------------------------------------------------------------------------------------------------------------------------------------------------------------------------------------------------------------------------------------------------------|
| Dogas et al (2020)              | Cross-sectional    | Croatia | Adults - General                        | 3027 | NR    | Median (IQR) 40 (30-50) | 79.7 | Online survey - not validated | None                          | 6 | 'Long-term home confinement and quarantine'                                                                                                                                                                                                                                                                                                                                                                                                                                                                                                                                                           |
| Dutta et al (2020)              | Observational      | India   | Children - General                      | 153  | 8-16  | NR                      | NR   | None                          | Questionnaire - not validated | 4 | 'Restrictions on various social practices and behaviour. People had to spend time mostly confined at their homes. School, college, and offices were initially closed and later were partially or fully resumed in virtual platform with the help of electronic devices and Internet facility.'                                                                                                                                                                                                                                                                                                        |
| Elran-Barak and Mozeikov (2020) | Cross-sectional    | Israel  | Adults - Chronic Medical Conditions     | 315  | NR    | NR                      | 60   | None                          | Questionnaire - not validated | 3 | 'Israelis were not allowed to leave their homes unless absolutely necessary, putting a near-lockdown into effect. Essential services—including grocery stores, pharmacies, and banks—remained open, but people were prohibited from venturing more than 100m from their homes, apart from under certain circumstances (e.g., stocking up on food and medicine). Non-essential stores were required to close, and parks were to remain shut. People were required not to participate in any social gatherings and to limit face-to-face interactions with individuals outside the immediate household' |
| Endstrasser et al (2020)        | Prospective cohort | Austria | Adults - with end stage osteo arthritis | 63   | 26-86 | 62.4 (11.84)            | 44   | Tegner activity scale         | NR                            | 4 | NR                                                                                                                                                                                                                                                                                                                                                                                                                                                                                                                                                                                                    |
| Ernstsen et al (2020)           | Cross-sectional    | Norway  | Adults - General                        | 1281 | 18-81 | 48.9 (11.4)             | 31   | Questionnaire - not validated | None                          | 5 | 'organized sports activities were to be discontinued and several businesses were closed, including stadiums, gyms and swimming pools'                                                                                                                                                                                                                                                                                                                                                                                                                                                                 |

|                     |                            |           |                                 |      |    |             |      |                               |      |   |                                                                                                                                                                                                                                                                                                                                                                                                                                                                                                                                                                                                                                                                                                                                                                                                                                |
|---------------------|----------------------------|-----------|---------------------------------|------|----|-------------|------|-------------------------------|------|---|--------------------------------------------------------------------------------------------------------------------------------------------------------------------------------------------------------------------------------------------------------------------------------------------------------------------------------------------------------------------------------------------------------------------------------------------------------------------------------------------------------------------------------------------------------------------------------------------------------------------------------------------------------------------------------------------------------------------------------------------------------------------------------------------------------------------------------|
| Galle et al (2020a) | Cross-sectional            | Italy     | Adults - students               | 2125 | NR | 22.5 (0.08) | 62.8 | Questionnaire - not validated | NA   | 4 | 'limits the movement of individuals in the whole Italian national territory unless strictly motivated (in written form) by reasons of work or health. Shops must stay closed but those selling essentials, such as supermarkets or pharmacies need to ensure a distance of at least 1 m between customers. Schools, museums, cinemas, theatres, and any other social, recreational, or cultural centre must stay closed. Any gathering in public spaces is forbidden, including sporting events and funerals. At the same time, in order to minimize the possible side effects of the lockdown on health, the Italian Ministry of Health issued a series of recommendations targeted at four rules for maintaining a healthy lifestyle: correct diet, daily physical activity (PA), reduce alcohol consumption and no smoking' |
| Galle et al (2020b) | Cross-sectional            | Italy     | Adults - General                | 1430 | NR | 22.9 (3.5)  | 65.5 | IPAQ                          | ASBQ | 6 | 'People were allowed to move only for work or health reasons or to buy essentials. Therefore, the great part of the Italian population was forced to live in home-confinement for weeks'                                                                                                                                                                                                                                                                                                                                                                                                                                                                                                                                                                                                                                       |
| Gallo et al (2020)  | Longitudinal observational | Australia | Adults - undergraduate students | 149  | NR | NR          | 0    | Active Australia survey       | NR   | 6 | 'All but essential services were shut down and universities transitioned all undergraduate learning online. By 30 March 2020, people were only allowed to leave their homes for work (in an essential service), or to purchase food, receive or                                                                                                                                                                                                                                                                                                                                                                                                                                                                                                                                                                                |



|                             |                    |                        |                  |     |       |               |      |                               |                               |   |                                                                                                                                                                                                                                                                                                                                                             |
|-----------------------------|--------------------|------------------------|------------------|-----|-------|---------------|------|-------------------------------|-------------------------------|---|-------------------------------------------------------------------------------------------------------------------------------------------------------------------------------------------------------------------------------------------------------------------------------------------------------------------------------------------------------------|
|                             |                    |                        |                  |     |       |               |      |                               |                               |   | provide medical care, or exercise.'                                                                                                                                                                                                                                                                                                                         |
| Gilic et al (2020)          | Prospective cohort | Bosnia and Herzegovina | Adolescents      | 688 | 15-18 | 17            | 46.8 | PAQ-A                         | None                          | 4 | 'measures of social distancing had been imposed, including the closing of schools, sports clubs, fitness centres, and shopping malls, and public gatherings were restricted.'                                                                                                                                                                               |
| Giustino et al (2020)       | Cross-sectional    | Italy                  | Adults - General | 802 | NR    | 32.27 (12.81) | 51   | IPAQ                          | NR                            | 4 | NR                                                                                                                                                                                                                                                                                                                                                          |
| He et al (2020)             | NR                 | China                  | Adults - General | 339 | NR    | 36.4 (11.9)   | 0    | Questionnaire - not validated | None                          | 5 | 'Chinese New Year celebrations were cancelled, collective activities, bus and railway service was suspended, and factories and restaurants were closed. Curfew and quarantine measures were implemented in many mainland cities. The flow of people was controlled by allowing only 1 person from each household to go out to buy necessities every 2-3 d.' |
| Husain and Ashkanani (2020) | Cross-sectional    | Kuwait                 | Adults - General | 415 | 18-73 | 38.47 (12.73) | 68.7 | Questionnaire - not validated | Questionnaire - not validated | 5 | Kuwait imposed a partial nationwide curfew on the 22nd of March 2020 until further notice. The government then imposed a total lockdown from the 10th to the 31st of May 2020.                                                                                                                                                                              |
| Ingram et al (2020)         | Cross-sectional    | Scotland               | Adults - General | 399 | 18-72 | 32.4 (11.4)   | 56.4 | Questionnaire - not validated | None                          | 4 | 'Scotland was under strict lockdown conditions where leaving the house was allowed for necessary work, to shop for essentials, and for unrestricted exercise.'                                                                                                                                                                                              |
| Karuc et al (2020)          | Cross-sectional    | Croatia                | Adults - General | 59  | NR    | 21.6 (0.4)    | 100  | SHAPES                        | None                          | 5 | 'the Croatian Government adopted measures to restrict gathering in public places and parks,                                                                                                                                                                                                                                                                 |

|                            |                 |           |                         |      |    |             |       |                               |                               |   |                                                                                                                                                                                                                                                                                                                                                                                           |
|----------------------------|-----------------|-----------|-------------------------|------|----|-------------|-------|-------------------------------|-------------------------------|---|-------------------------------------------------------------------------------------------------------------------------------------------------------------------------------------------------------------------------------------------------------------------------------------------------------------------------------------------------------------------------------------------|
|                            |                 |           |                         |      |    |             |       |                               |                               |   | suspend public transportation, and close institutions. Besides all social gatherings, work in retail and services including sports activities were prohibited'                                                                                                                                                                                                                            |
| Knell et al (2020)         | Cross-sectional | USA       | Adults - General        | 1809 | NR | NR          | 67.4  | IPAQ                          | None                          | 4 | 'The specific of these initiatives varied by state, but they generally included advisories to stay home, bans on large gatherings, restricted access to parks and community resources, closure of schools and non-essential businesses, and quarantine orders'                                                                                                                            |
| Kriaucioniene et al (2020) | Cross-sectional | Lithuania | Adults - General        | 2447 | NR | NR          | 87.8  | Questionnaire - not validated | None                          | 5 | 'the Lithuanian Government decided to declare quarantine from 16 to 30 March [2]. This was extended several times and ended on 16 June. All public indoor and outdoor gatherings were prohibited. Educational institutions began to work remotely. Shops excluding grocery shops and pharmacies were closed. Restaurants and bars were also closed, leaving the option for food takeaway' |
| Lopez-Bueno et al (2020a)  | Cross-sectional | Spain     | Adults - General        | 2042 | NR | 35.9(13.6)  | 54.1  | PAVS short form               | None                          | 4 | 'Government-enacted national confinement - During the confinement period, the Spanish population had to stay at home'                                                                                                                                                                                                                                                                     |
| Lopez-Bueno et al (2020b)  | Cross-sectional | Spain     | Adults - General        | 1591 | NR | 34.2 (13)   | 51.8  | Questionnaire - not validated | Questionnaire - not validated | 5 | 'Confinement measures to minimize the propagation of the virus'                                                                                                                                                                                                                                                                                                                           |
| Majumdar et al (2020)      | Cross-sectional | India     | Adults - office workers | 203  | NR | 33.1 (7.11) | 18.22 | None                          | Questionnaire - not validated | 4 |                                                                                                                                                                                                                                                                                                                                                                                           |

|                         |                      |                        |                                        |      |        |               |       |                               |                               |   |                                                                                                                                                                                                                                                                                                                                                                                                                                                                                              |
|-------------------------|----------------------|------------------------|----------------------------------------|------|--------|---------------|-------|-------------------------------|-------------------------------|---|----------------------------------------------------------------------------------------------------------------------------------------------------------------------------------------------------------------------------------------------------------------------------------------------------------------------------------------------------------------------------------------------------------------------------------------------------------------------------------------------|
|                         |                      |                        | Adults - undergraduate students        | 325  | NR     | 22.1 (1.66)   | 60.92 | None                          | Questionnaire - not validated |   | 'Home confinement as a measure to mitigate disease outbreak'                                                                                                                                                                                                                                                                                                                                                                                                                                 |
| Mandelkorn et al (2020) | Cross-sectional      | Various (49 countries) | Adults - General                       | 2562 | NR     | 45.18 (14.46) | 68.18 | Questionnaire - not validated | None                          | 4 | NR                                                                                                                                                                                                                                                                                                                                                                                                                                                                                           |
| Maugeri et al (2020)    | Cross-sectional      | Italy                  | Adults - General                       | 2524 | NR     | NR            | 56.4  | IPAQ-SF                       | None                          | 5 | 'movement of the population, schools, public places and businesses were shutdowns. Moreover, people can move away from their home only to do essential work (healthcare and social care sectors, police and armed forces, firefighting, water and electricity supply) or perform essential activities (health visits, purchasing medicines or food).'                                                                                                                                        |
|                         |                      |                        | Young adults (<21yrs)                  | 346  | <21    | NR            | NR    |                               |                               |   |                                                                                                                                                                                                                                                                                                                                                                                                                                                                                              |
|                         |                      |                        | Young adult (21-40)                    | 1178 | 21-40  | NR            | NR    |                               |                               |   |                                                                                                                                                                                                                                                                                                                                                                                                                                                                                              |
|                         |                      |                        | Adults aged 41-60                      | 704  | 41-60  | NR            | NR    |                               |                               |   |                                                                                                                                                                                                                                                                                                                                                                                                                                                                                              |
|                         |                      |                        | Adults aged 60+                        | 296  | 60+    | NR            | NR    |                               |                               |   |                                                                                                                                                                                                                                                                                                                                                                                                                                                                                              |
| Meyer et al (2020)      | Cross-sectional      | USA                    | Adults - General                       | 3052 | 18-75+ | NR            | 62    | Questionnaire - not validated | Questionnaire - not validated | 5 | 'Social isolation' and 'stay at home isolation'                                                                                                                                                                                                                                                                                                                                                                                                                                              |
| Mitra et al (2020)      | Retrospective cohort | Canada                 | Children 5-17                          | 1472 | 5-17   | NR            | NR    | Questionnaire - not validated | Questionnaire - not validated | 4 | 'maintaining physical distance from others by two or more metres (except those living in the same household), prohibiting social gatherings, cancelling team sports and related events, and closing playgrounds and parks (in some jurisdictions) (Govt. of Canada, 2020; The Canadian Urban Institute, 2020). Most public schools and school grounds were closed across the country in response to the pandemic and classroom lessons were replaced by home-schooling and online learning.' |
|                         |                      |                        | Children 5-11                          | 693  | 5-11   | NR            | NR    |                               |                               |   |                                                                                                                                                                                                                                                                                                                                                                                                                                                                                              |
|                         |                      |                        | Youth 12-17                            | 779  | 12-17  | NR            | NR    |                               |                               |   |                                                                                                                                                                                                                                                                                                                                                                                                                                                                                              |
| Mon-Lopez et al (2020a) | Cross-sectional      | Spain                  | Adults - professional handball players | 187  | NR     | NR            | 35.3  | Questionnaire - not validated | NR                            | 6 | 'Specifically, in handball, the last matches in Spain were played on 7–8 March 2020, and all handball players had to remain in their respective                                                                                                                                                                                                                                                                                                                                              |

|                           |                             |              |                                       |     |        |               |      |                                                 |                                             |   |                                                                                                                                                                                                                                                                                                                  |
|---------------------------|-----------------------------|--------------|---------------------------------------|-----|--------|---------------|------|-------------------------------------------------|---------------------------------------------|---|------------------------------------------------------------------------------------------------------------------------------------------------------------------------------------------------------------------------------------------------------------------------------------------------------------------|
|                           |                             |              |                                       |     |        |               |      |                                                 |                                             |   | houses at least until 4 May 2020 (almost eight weeks).'                                                                                                                                                                                                                                                          |
| Mon-Lopez et al (2020b)   | Cross-sectional             | Spain        | Adults - General                      | 120 | NR     | 36.65 (13.61) | 50   | IPAQ                                            | Questionnaire - not validated               | 5 | 'Home confinement as a measure to mitigate disease outbreak'                                                                                                                                                                                                                                                     |
| Munasinghe et al (2020)   | Longitudinal observational  | Australia    | Adolescents                           | 464 | 13-19  | NR            | NR   | Questionnaire - not validated                   | Questionnaire - not validated               | 5 | 'One of the key strategies to reduce the rate of infection has been physical distancing and, for school- aged children, a move to the online delivery of schooling. Authorities requested that people remain in their homes wherever possible and limit their travel to obtaining essential goods and services.' |
| Muriel et al (2020)       | Longitudinal observational  | Spain        | Adults - professional cyclists        | 18  | NR     | 24.9 (2.8)    | 0    | Objective data collection - specialist software | None                                        | 6 | NR                                                                                                                                                                                                                                                                                                               |
| Pellegrini et al (2020)   | Retrospective observational | Italy        | Adults - patients from obesity clinic | 150 | NR     | 47.9 (16)     | 77.3 | Questionnaire - not validated                   |                                             | 4 | 'People had to stay at home and were only allowed to go out to buy food or for health reasons; all working activities were suspended or turned into smart working at home, except for essential activities (health workers, food supply and sale, cleaning of cities, and police, etc.).'                        |
| Pietrobelli et al. (2020) | Cross-sectional             | Italy        | Children with obesity                 | 41  | Jun-18 | 13 (3.1)      | 46.3 | Subjective answers from telephone interview     | Subjective answers from telephone interview | 7 | 'In Italy who by mandate had to remain in their homes during the "lockdown". Lockdown confinement'                                                                                                                                                                                                               |
| Pillay, L et al (2020)    | Cross-sectional             | South Africa | Adults - elite athletes               | 692 | NR     | NR            | 33   | Questionnaire - not validated                   | Questionnaire - not validated               | 6 | 'In South Africa, level 5 lockdown measures were enforced from 26 March to 30 April (5 weeks). Only essential services, travel and shopping were allowed and exercise outside individual property boundaries was not allowed'                                                                                    |

|                              |                          |                                       |                                                       |      |       |              |      |                                         |                               |   |                                                                                                                                                                                                                                                                                                                                                                                                                                                                                                                                                                                                         |
|------------------------------|--------------------------|---------------------------------------|-------------------------------------------------------|------|-------|--------------|------|-----------------------------------------|-------------------------------|---|---------------------------------------------------------------------------------------------------------------------------------------------------------------------------------------------------------------------------------------------------------------------------------------------------------------------------------------------------------------------------------------------------------------------------------------------------------------------------------------------------------------------------------------------------------------------------------------------------------|
| Robinson et al (2020)        | Cross-sectional          | UK                                    | Adults - General                                      | 2002 | NR    | 34.74 (12.3) | 61.7 | Questionnaire - not validated           | Questionnaire - not validated | 4 | 'Formal social lockdown measures to restrict the spread of the virus.'                                                                                                                                                                                                                                                                                                                                                                                                                                                                                                                                  |
| Rogers et al (2020)          | Cross-sectional          | UK                                    | Adults - perceived 'at risk' of severe COVID outcomes | 9190 | 35-69 | NR           | 78   | NR                                      | NR                            | 6 | 'Everyone must stay in their homes unless (i) shopping for essentials such as food and medicine, (ii) requiring medical assistance, (iii) caring for vulnerable people, (iv) traveling to and from work if absolutely necessary and (v) to carry out one form of exercise (e.g. walking, running, cycling) each day, either alone or with people who live together. Some adults aged 70 and over and those with specific underlying health conditions including asthma, heart disease, diabetes, and being seriously overweight were also advised to follow stricter social isolation recommendations.' |
| Romero-Blanco et al (2020)   | Cross-sectional          | Spain                                 | Adults - undergraduate students                       | 213  | NR    | 20.5 (4.56)  | 80.8 | IPAQ-SF                                 | IPAQ-SF                       | 5 | 'Being confined to their homes'                                                                                                                                                                                                                                                                                                                                                                                                                                                                                                                                                                         |
| Ruiz-Roso et al (2020a)      | Cross-sectional          | Spain                                 | Adults - T2D                                          | 102  | 45-77 | 63           | 51.4 | IPAQ                                    | IPAQ                          | 6 | NR                                                                                                                                                                                                                                                                                                                                                                                                                                                                                                                                                                                                      |
| Ruiz-Roso et al (2020b)      | Cross-sectional          | Brazil, Chile, Columbia, Spain, Italy | Adolescents - General                                 | 726  | 16-19 | NR           | 59.6 | IPAQ                                    | NR                            | 5 | NR                                                                                                                                                                                                                                                                                                                                                                                                                                                                                                                                                                                                      |
| Sanchez-Sanchez et al (2020) | Cross-sectional          | Spain                                 | Adults - General                                      | 1065 | NR    | 38.7 (12.4)  | 72.8 | Questionnaire - not validated           | NR                            | 4 | 'Restrictive measures and house confinement'                                                                                                                                                                                                                                                                                                                                                                                                                                                                                                                                                            |
| Sankar et al (2020)          | Cross-sectional          | India                                 | Adults - T2D                                          | 110  | NR    | 58.67 (10.8) | 61.8 | Questionnaire - not validated           | NR                            | 3 | 'confined to remain indoors'                                                                                                                                                                                                                                                                                                                                                                                                                                                                                                                                                                            |
| Sanudo et al (2020)          | Cross-sectional          | Spain                                 | Adults - General                                      | 20   | 20-36 | 22.6 (3.4)   | 47   | IPAQ and pedometer                      | IPAQ                          | 6 | 'Social-distancing and home quarantine'                                                                                                                                                                                                                                                                                                                                                                                                                                                                                                                                                                 |
| Savage et al (2020)          | Longitudinal prospective | UK                                    | Adults - students                                     | 214  | NR    | NR           | 72   | Exercise Vital Sign (EVS) questionnaire | Questionnaire - not validated | 6 | 'People were required to stay at home, except for essential activities'                                                                                                                                                                                                                                                                                                                                                                                                                                                                                                                                 |

|                            |                            |         |                                    |       |    |             |       |                                   |                               |   |                                                                                                                                                                                                                                                        |
|----------------------------|----------------------------|---------|------------------------------------|-------|----|-------------|-------|-----------------------------------|-------------------------------|---|--------------------------------------------------------------------------------------------------------------------------------------------------------------------------------------------------------------------------------------------------------|
|                            |                            |         |                                    |       |    |             |       |                                   |                               |   | (i.e. to shop for necessities and exercise outside once per day).'                                                                                                                                                                                     |
| Schlichtiger et al (2020a) | Cross-sectional            | Germany | Adults - students                  | 1943  | NR | 23.3 (4.0)  | 70.7  | Questionnaire - not validated     | NR                            | 4 | 'People were obliged to only leave their accommodations for essential occupational requirements or to ensure household supplies.'                                                                                                                      |
| Schlichtiger et al (2020b) | Cross-sectional            | Germany | Adults - General                   | 110   | NR | 66 (10)     | 71    | PAQ 50+                           | NR                            | 5 | NR                                                                                                                                                                                                                                                     |
| Srivastav et al (2020)     | Cross-sectional            | India   | Adults - General                   | 143   | NR | 23.9        | NR    | IPAQ - SF                         | IPAQ - SF                     | 6 | NR                                                                                                                                                                                                                                                     |
| Vetrovsky et al (2020)     | Longitudinal observational | NR      | Adults - heart failure patients    | 26    | NR | 58.8 (9.8)  | 44.44 | Accelerometry (Garmin wristwatch) | NR                            | 4 | 'Prohibited movement in public spaces except under special circumstances, which included travelling to and from work and necessary journeys to procure food and supplies; notably, going outside for a walk in a park or the countryside was allowed.' |
| Wang et al (2020)          | Cross-sectional            | China   | Adults - General                   | 2289  | NR | 27.5 (12)   | 48.6  | Questionnaire - not validated     | Questionnaire - not validated | 5 | 'community-wide lockdowns, home quarantines, working-from-home, social distancing, and the prohibition of social gatherings'                                                                                                                           |
| Yang et al (2020a)         | Retrospective              | China   | Adolescents - high school students | 2824  | NR | 17.5 (1.2)  | 76    | IPAQ                              | IPAQ                          | 5 | NR                                                                                                                                                                                                                                                     |
|                            |                            |         | Adults - undergraduate students    | 7024  | NR | 20.6 (1.8)  | 70    |                                   |                               |   |                                                                                                                                                                                                                                                        |
|                            |                            |         | Adults - Graduate students         | 234   | NR | 24.6 (3.5)  | 70.9  |                                   |                               |   |                                                                                                                                                                                                                                                        |
|                            |                            |         | Adults - general                   | 10082 | NR | 19.8 (2.3)  | NR    |                                   |                               |   |                                                                                                                                                                                                                                                        |
| Yang et al (2020b)         | Longitudinal observational | USA     | Adults - General                   | 431   | NR | 39.1 (10.6) | 49    | IPAQ                              | IPAQ                          | 5 | 'Stay-at-home policies; closure of gyms; reduced access to outdoor sport facilities; and home office regulation'                                                                                                                                       |
| Zenic et al (2020)         | Longitudinal prospective   | Croatia | Adolescents                        | 823   | NR | NR          | NR    | Physical Activity                 | NR                            | 5 | NR                                                                                                                                                                                                                                                     |

|  |  |  |  |  |  |  |  |                                  |  |  |  |
|--|--|--|--|--|--|--|--|----------------------------------|--|--|--|
|  |  |  |  |  |  |  |  | Questionnaire<br>for Adolescents |  |  |  |
|--|--|--|--|--|--|--|--|----------------------------------|--|--|--|

NR = Not Reported; IPAQ, International Physical Activity Questionnaire; IPAQ-SF = International Physical Activity Questionnaire Short-Form; EDE-Q = Eating Disorder Examination Questionnaire; PAQ-A = Physical Activity Questionnaire - Adolescents; SHAPES = School Health Action, Planning, and Evaluation Systems questionnaire; PAVS = Physical Activity Vital Sign; PAQ 50+ = Physical Activity Questionnaire for 50+ \*Description of lockdown as reported by respective study authors

**Supplementary Table 4: NOS Scores for all included studies (range: 0-10 stars, with higher scores indicating better quality research)**

| Author                                     | Representativeness of sample | Sample Size | Non-respondents | Ascertainment of the exposure | Comparability | Assessment of the outcome | Statistics | Total 'stars' |
|--------------------------------------------|------------------------------|-------------|-----------------|-------------------------------|---------------|---------------------------|------------|---------------|
| Ammar <i>et al</i> (2020)                  | 1                            | 1           | 0               | 2                             | 0             | 1                         | 1          | 6             |
| Asiamah <i>et al</i> (2020)                | 1                            | 1           | 0               | 1                             | 0             | 1                         | 1          | 5             |
| Assaloni <i>et al</i> (2020)               | 1                            | 0           | 0               | 2                             | 0             | 1                         | 1          | 5             |
| Barwais (2020)                             | 1                            | 0           | 0               | 2                             | 0             | 1                         | 1          | 5             |
| Bivi-Roig <i>et al</i> (2020)              | 1                            | 0           | 0               | 1                             | 0             | 1                         | 1          | 4             |
| Bourdas <i>et al</i> (2020a)               | 1                            | 0           | 0               | 2                             | 1             | 1                         | 1          | 6             |
| Bourdas <i>et al</i> (2020b)               | 1                            | 0           | 0               | 2                             | 0             | 1                         | 1          | 5             |
| Bowes <i>et al</i> (2020)                  | 1                            | 0           | 0               | 0                             | 0             | 1                         | 1          | 3             |
| Branley-Bell <i>et al</i> (2020)           | 1                            | 0           | 0               | 1                             | 0             | 1                         | 1          | 4             |
| Buoite Stella <i>et al</i> (2020)          | 1                            | 0           | 0               | 2                             | 0             | 1                         | 1          | 5             |
| Callow <i>et al</i> (2020)                 | 1                            | 0           | 0               | 2                             | 0             | 1                         | 1          | 5             |
| Canello <i>et al</i> (2020)                | 1                            | 0           | 0               | 1                             | 0             | 1                         | 1          | 4             |
| Caruso <i>et al</i> (2020)                 | 1                            | 0           | 0               | 0                             | 0             | 1                         | 1          | 3             |
| Castaneda-Babarro Coca <i>et al</i> (2020) | 1                            | 0           | 0               | 2                             | 0             | 1                         | 1          | 5             |
| Castellini <i>et al</i> (2020)             | 1                            | 0           | 0               | 2                             | 1             | 1                         | 1          | 6             |
| Constandt <i>et al</i> (2020a)             | 1                            | 1           | 0               | 1                             | 2             | 1                         | 1          | 7             |
| Constant <i>et al</i> (2020b)              | 1                            | 0           | 0               | 1                             | 0             | 1                         | 1          | 4             |
| Di Corrado <i>et al</i> (2020)             | 1                            | 0           | 0               | 0                             | 0             | 1                         | 1          | 3             |
| Di Stefano <i>et al</i> (2020)             | 1                            | 0           | 0               | 2                             | 1             | 1                         | 1          | 6             |
| Dogas <i>et al</i> (2020)                  | 1                            | 0           | 0               | 1                             | 0             | 1                         | 1          | 4             |
| Dutta <i>et al</i> (2020)                  | 1                            | 0           | 0               | 0                             | 0             | 1                         | 1          | 3             |
| Elran-Barak and Mozeikov (2020)            | 1                            | 0           | 0               | 1                             | 0             | 1                         | 1          | 4             |
| Endstrasser <i>et al</i> (2020)            | 1                            | 1           | 0               | 1                             | 0             | 1                         | 1          | 5             |
| Ernstsen <i>et al</i> (2020)               | 1                            | 0           | 0               | 1                             | 0             | 1                         | 1          | 4             |
| Galle <i>et al</i> (2020a)                 | 1                            | 1           | 0               | 2                             | 0             | 1                         | 1          | 6             |
| Galle <i>et al</i> (2020b)                 | 1                            | 1           | 0               | 2                             | 0             | 1                         | 1          | 6             |
| Gallo <i>et al</i> (2020)                  | 1                            | 0           | 0               | 1                             | 0             | 1                         | 1          | 4             |
| Gilic <i>et al</i> (2020)                  | 0                            | 0           | 0               | 2                             | 0             | 1                         | 1          | 4             |



|                                     |   |   |   |   |   |   |   |   |
|-------------------------------------|---|---|---|---|---|---|---|---|
| Giustino <i>et al</i> (2020)        | 1 | 1 | 0 | 1 | 0 | 1 | 1 | 5 |
| He <i>et al</i> (2020)              | 1 | 0 | 0 | 1 | 0 | 2 | 1 | 5 |
| Husain and Ashkanani (2020)         | 1 | 1 | 0 | 0 | 0 | 1 | 1 | 4 |
| Ingram <i>et al</i> (2020)          | 1 | 1 | 0 | 1 | 0 | 1 | 1 | 5 |
| Karuc <i>et al</i> (2020)           | 0 | 0 | 0 | 2 | 0 | 1 | 1 | 4 |
| Knell <i>et al</i> (2020)           | 1 | 0 | 0 | 2 | 0 | 1 | 1 | 5 |
| Kriaucioniene <i>et al</i> (2020)   | 1 | 0 | 0 | 1 | 0 | 1 | 1 | 4 |
| Lopez-Bueno <i>et al</i> (2020a)    | 1 | 0 | 0 | 1 | 1 | 1 | 1 | 5 |
| Lopez-Bueno <i>et al</i> (2020b)    | 1 | 0 | 0 | 1 | 0 | 1 | 1 | 4 |
| Majumdar <i>et al</i> (2020)        | 1 | 0 | 0 | 1 | 0 | 1 | 1 | 4 |
| Mandelkorn <i>et al</i> (2020)      | 1 | 0 | 1 | 1 | 0 | 1 | 1 | 5 |
| Maugeri <i>et al</i> (2020)         | 1 | 0 | 0 | 2 | 0 | 1 | 1 | 5 |
| Meyer <i>et al</i> (2020)           | 1 | 0 | 1 | 0 | 0 | 1 | 1 | 4 |
| Mitra <i>et al</i> (2020)           | 1 | 1 | 1 | 1 | 0 | 1 | 1 | 6 |
| Mon-Lopez <i>et al</i> (2020a)      | 1 | 0 | 0 | 1 | 1 | 1 | 1 | 5 |
| Mon-Lopez <i>et al</i> (2020b)      | 1 | 0 | 0 | 2 | 0 | 1 | 1 | 5 |
| Munasinghe <i>et al</i> (2020)      | 1 | 0 | 1 | 2 | 1 | 1 | 1 | 7 |
| Muriel <i>et al</i> (2020)          | 1 | 0 | 0 | 2 | 1 | 1 | 1 | 6 |
| Pellegrini <i>et al</i> (2020)      | 1 | 0 | 0 | 1 | 0 | 1 | 1 | 4 |
| Pietrobelli <i>et al</i> (2020)     | 1 | 0 | 0 | 1 | 0 | 1 | 1 | 4 |
| Pillay, L <i>et al</i> (2020)       | 1 | 1 | 0 | 2 | 0 | 2 | 1 | 7 |
| Robinson <i>et al</i> (2020)        | 1 | 1 | 0 | 2 | 0 | 1 | 1 | 6 |
| Rogers <i>et al</i> (2020)          | 1 | 0 | 0 | 0 | 1 | 1 | 1 | 4 |
| Romero-Blanco <i>et al</i> (2020)   | 1 | 1 | 0 | 2 | 0 | 1 | 1 | 6 |
| Ruiz-Roso <i>et al</i> (2020a)      | 1 | 0 | 0 | 2 | 0 | 1 | 1 | 5 |
| Ruiz-Roso <i>et al</i> (2020b)      | 1 | 0 | 1 | 2 | 0 | 1 | 1 | 6 |
| Sanchez-Sanchez <i>et al</i> (2020) | 1 | 1 | 0 | 0 | 0 | 1 | 1 | 4 |
| Sankar <i>et al</i> (2020)          | 1 | 0 | 0 | 0 | 0 | 1 | 1 | 3 |
| Sanudo <i>et al</i> (2020)          | 1 | 0 | 0 | 2 | 0 | 2 | 1 | 6 |
| Savage <i>et al</i> (2020)          | 1 | 0 | 1 | 2 | 0 | 1 | 1 | 6 |
| Schlichtiger <i>et al</i> (2020a)   | 1 | 0 | 1 | 0 | 0 | 1 | 1 | 4 |

|                                   |   |   |   |   |   |   |   |   |
|-----------------------------------|---|---|---|---|---|---|---|---|
| Schlichtiger <i>et al</i> (2020b) | 1 | 0 | 0 | 2 | 0 | 1 | 1 | 5 |
| Srivastav <i>et al</i> (2020)     | 1 | 1 | 0 | 2 | 0 | 1 | 1 | 6 |
| Vetrovsky <i>et al</i> (2020)     | 1 | 0 | 0 | 0 | 0 | 2 | 1 | 4 |
| Wang <i>et al</i> (2020)          | 1 | 0 | 0 | 2 | 0 | 1 | 1 | 5 |
| Yang <i>et al</i> (2020a)         | 1 | 0 | 0 | 2 | 0 | 1 | 1 | 5 |
| Yang <i>et al</i> (2020b)         | 1 | 0 | 0 | 2 | 0 | 1 | 1 | 5 |
| Zenic <i>et al</i> (2020)         | 1 | 0 | 0 | 2 | 0 | 1 | 1 | 5 |

Supplementary Table 5. Physical activity pre and during lockdown

| Author               | PA type and units of measurement    | PA Pre-Lockdown Mean (SD) | PA During Lockdown Mean (SD) | Change in PA | P value (if applicable) |
|----------------------|-------------------------------------|---------------------------|------------------------------|--------------|-------------------------|
| Ammar et al (2020)   | <i>All PA</i>                       |                           |                              |              |                         |
|                      | Days/Week                           | 5.0 (2.5)                 | 3.8 (2.8)                    | - 24.0%      | < 0.001                 |
|                      | Min/Week                            | 108.0 (114.2)             | 71.8 (88.2)                  | - 33.5%      | < 0.001                 |
|                      | MET values                          | 2192.6 (3300.7)           | 1360.2 (2545.2)              | - 38.0%      | < 0.001                 |
|                      | <i>Vigorous PA</i>                  |                           |                              |              |                         |
|                      | Days/Week                           | 2.0 (2.1)                 | 1.5 (2.0)                    | - 22.7%      | < 0.001                 |
|                      | Min/Week                            | 38.7 (57.1)               | 26.0 (47.8)                  | - 33.1%      | < 0.001                 |
|                      | MET values                          | 1168 (2468.7)             | 737.2 (1844.5)               | - 36.9%      | < 0.001                 |
|                      | <i>Moderate PA</i>                  |                           |                              |              |                         |
|                      | Days/Week                           | 1.8 (2.1)                 | 1.36 (2.0)                   | - 24.0%      | < 0.001                 |
|                      | Min/Week                            | 32.1 (49.0)               | 21.4 (37.3)                  | - 33.4%      | < 0.001                 |
|                      | MET values                          | 446.4 (920.2)             | 291.5 (772.7)                | - 34.7%      | < 0.001                 |
|                      | <i>Walking</i>                      |                           |                              |              |                         |
|                      | Days/Week                           | 3.6 (2.6)                 | 2.3 (2.5)                    | - 35.0%      | < 0.001                 |
|                      | Min/Week                            | 37.2 (46.8)               | 24.6 (34.1)                  | - 34.0%      | < 0.001                 |
| MET values           | 578.3 (917.1)                       | 331.4 (640.2)             | - 42.7%                      | < 0.001      |                         |
| Asiamah et al (2020) | <i>Moderate PA - % participants</i> | NR                        |                              | NR           | NR                      |
|                      | No time lost/week                   |                           | 20%                          |              |                         |
|                      | 1-30 min lost/week                  |                           | 7.2%                         |              |                         |
|                      | 30-59 min lost/week                 |                           | 11.8%                        |              |                         |
|                      | 1-3hrs lost/week                    |                           | 28.0%                        |              |                         |
|                      | 4-6hrs lost/week                    |                           | 12.1%                        |              |                         |
|                      | >6hrs lost/week                     |                           | 20.9%                        |              |                         |
|                      | <i>Vigorous PA - % participants</i> |                           |                              |              |                         |
|                      | No time lost/week                   |                           | 29.6%                        |              |                         |
|                      | 1-30 min lost/week                  |                           | 10.5%                        |              |                         |
|                      | 30-59 min lost/week                 |                           | 23.2%                        |              |                         |
|                      | 1-3hrs lost/week                    |                           | 25.4%                        |              |                         |
|                      | 4-6hrs lost/week                    |                           | 5.6%                         |              |                         |
|                      | >6hrs lost/week                     |                           | 5.6%                         |              |                         |
|                      | Assaloni et al (2020)               | <i>Exercise</i>           |                              |              |                         |
| Godin Scale score    |                                     | 38.6 (1.7)                | 25.0 (1.7)                   | - 13.6       | < 0.001                 |
| Minutes per day      |                                     | 66 (42)                   | 38 (31)                      | - 28         | < 0.001                 |

|                                     |                                           |                    |                    |           |         |
|-------------------------------------|-------------------------------------------|--------------------|--------------------|-----------|---------|
|                                     | Steps                                     | 12606 (5026)       | 4760 (3145)        | - 7846    | < 0.001 |
|                                     | % participants                            |                    |                    |           |         |
|                                     | Exercise alone                            | 36.4%              | 82.5%              | + 46.1%   | NR      |
|                                     | No exercise                               | 9.1%               | 17.5%              | + 8.4%    |         |
| Barwais (2020)                      | <i>Physical Activity – MET-min/week</i>   |                    |                    |           |         |
|                                     | All participants                          | 903 (755.6)        | 387 (397.8)        | - 516     | < 0.001 |
|                                     | Males                                     | 951 (740.5)        | 398 (413.1)        | - 553     | < 0.001 |
|                                     | Females                                   | 818 (77.5)         | 368 (369.9)        | -450      | < 0.01  |
| Bivi-Roig et al (2020) <sup>b</sup> | <i>Vigorous PA</i>                        |                    |                    |           |         |
|                                     | Days/week                                 | 2 (3)              | 0 (2)              | - 2       | 0.001   |
|                                     | Min/day                                   | 60 (70)            | 0 (30)             | - 60      | < 0.001 |
|                                     | <i>Moderate PA</i>                        |                    |                    |           |         |
|                                     | Days/week                                 | 3 (3)              | 3 (3.5)            | 0         | 0.009   |
|                                     | Min/day                                   | 60 (80)            | 60 (60)            | 0         | < 0.001 |
|                                     | <i>Walking</i>                            |                    |                    |           |         |
|                                     | Days/week                                 | 7 (2)              | 3 (6)              | - 4       | < 0.001 |
|                                     | Min/day                                   | 90 (60)            | 30 (60)            | - 60      | < 0.001 |
| Bourdass et al (2020a) <sup>c</sup> | <i>PA phase 1 lockdown – MET-min/week</i> |                    |                    |           |         |
|                                     | (All participants)                        |                    |                    |           |         |
|                                     | Daily occupation PA                       | 4736.30 (124.08)   | 1945.34 (90.32)    | - 2791    | < 0.05  |
|                                     | Transportation PA                         | 1309.86 (38.00)    | 714.21 (30.88)     | - 595.65  | < 0.05  |
|                                     | Leisure time activities PA                | 6241.27 (197.67)   | 7335.26 (196.68)   | + 1093.99 | < 0.05  |
|                                     | Sporting activities PA                    | 3511.92 (182.79)   | 2406.97 (184.54)   | - 1105    | < 0.05  |
|                                     | Overall PA                                | 15,799.35 (345.60) | 12,401.78 (304.26) | - 3397.6  | < 0.05  |
|                                     | (Males)                                   |                    |                    |           |         |
|                                     | Daily occupation PA                       | 5389.69 (207.55)   | 2310.97 (157.29)   | - 3078.7  | < 0.05  |
|                                     | Transportation PA                         | 1533.87 (63.91)    | 885.12 (56.04)     | - 648.75  | < 0.05  |
|                                     | Leisure time activities PA                | 5844.67 (291.60)   | 6962.63 (324.27)   | + 1117.96 | < 0.05  |
|                                     | Sporting activities PA                    | 4711.57 (347.93)   | 2759.22 (223.91)   | - 1952.4  | < 0.05  |
|                                     | Overall PA                                | 17,479.80 (559.02) | 12,917.95 (479.92) | - 4561.9  | < 0.05  |
|                                     | (Females)                                 |                    |                    |           |         |
|                                     | Daily occupation PA                       | 4252.13 (148.71)   | 1674.41 (104.26)   | - 2577.7  | < 0.05  |
|                                     | Transportation PA                         | 1143.87 (45.03)    | 587.56 (33.22)     | - 556.31  | < 0.05  |

|  |                                           |                    |                    |           |        |
|--|-------------------------------------------|--------------------|--------------------|-----------|--------|
|  | Leisure time activities PA                | 6535.15 (267.42)   | 7611.38 (243.56)   | + 1076.23 | < 0.05 |
|  | Sporting activities PA                    | 2622.99 (178.12)   | 2145.96 (274.78)   | - 477.03  | > 0.05 |
|  | Overall PA                                | 14,554.14 (429.60) | 12,019.31 (392.19) | - 2534.8  | < 0.05 |
|  | <i>PA phase 2 lockdown – MET-min/week</i> |                    |                    |           |        |
|  | (All participants)                        | 4215.07 (78.41)    | 1968.05 (58.68)    | - 2247    | < 0.05 |
|  | Daily occupation PA                       | 1218.20 (23.71)    | 697.59 (19.92)     | - 520.61  | < 0.05 |
|  | Transportation PA                         | 6097.88 (127.67)   | 7422.19 (132.92)   | + 1324.31 | < 0.05 |
|  | Leisure time activities PA                | 2763.87 (151.89)   | 2215.42 (134.19)   | - 548.45  | < 0.05 |
|  | Sporting activities PA                    | 14,295.02 (248.35) | 12,303.25 (234.23) | - 1991.8  | < 0.05 |
|  | Overall PA                                |                    |                    |           |        |
|  | (Males)                                   |                    |                    |           |        |
|  | Daily occupation PA                       | 5177.27 (182.93)   | 2711.06 (153.70)   | - 2466.2  | < 0.05 |
|  | Transportation PA                         | 1314.24 (50.73)    | 841.68 (45.25)     | - 472.56  | < 0.05 |
|  | Leisure time activities PA                | 6062.08 (289.05)   | 7198.64 (282.94)   | + 1136.56 | < 0.05 |
|  | Sporting activities PA                    | 3849.72 (529.94)   | 2809.8 (509.74)    | - 1039.9  | < 0.05 |
|  | Overall PA                                | 16,403.31 (695.56) | 13,561.17 (722.59) | - 2842.1  | < 0.05 |
|  | (Females)                                 |                    |                    |           |        |
|  | Daily occupation PA                       | 3933.68 (84.90)    | 1750.77 (60.11)    | - 2182.9  | < 0.05 |
|  | Transportation PA                         | 1190.11 (26.79)    | 655.45 (21.99)     | - 534.66  | < 0.05 |
|  | Leisure time activities PA                | 6108.35 (141.75)   | 7487.56 (150.56)   | + 1379.21 | < 0.05 |
|  | Sporting activities PA                    | 2446.32 (119.58)   | 2041.59 (88.39)    | - 404.73  | < 0.05 |
|  | Overall PA                                | 13,678.46 (246.46) | 11,935.38 (216.14) | - 1743.1  | < 0.05 |
|  | <i>PA phase 3 lockdown – MET-min/week</i> |                    |                    |           |        |
|  | (All participants)                        |                    |                    |           |        |
|  | Daily occupation PA                       | 4284.91 (106.59)   | 2349.61 (92.47)    | - 1935.3  | < 0.05 |
|  | Transportation PA                         | 1254.93 (34.68)    | 852.65 (31.60)     | - 402.28  | < 0.05 |
|  | Leisure time activities PA                | 7007.04 (212.80)   | 8133.13 (205.16)   | + 1126.09 | < 0.05 |
|  | Sporting activities PA                    | 2328.27 (144.66)   | 1901.51 (99.98)    | - 426.76  | < 0.05 |
|  | Overall PA                                | 14,875.14 (328.38) | 13,236.89 (284.78) | - 1638.3  | < 0.05 |
|  | (Males)                                   |                    |                    |           |        |
|  | Daily occupation PA                       | 4806.32 (217.88)   | 2676.81 (181.48)   | - 2129.5  | < 0.05 |
|  | Transportation PA                         | 1477.38 (77.31)    | 996.89 (70.51)     | - 480.49  | < 0.05 |
|  | Leisure time activities PA                | 7075.62 (458.93)   | 7247.03 (411.29)   | + 171.41  | > 0.05 |
|  | Sporting activities PA                    | 3404.49 (278.21)   | 2823.46 (248.08)   | - 581.03  | < 0.05 |
|  | Overall PA                                | 16,763.82 (722.40) | 13,744.19 (632.52) | - 3019.6  | < 0.05 |

|                                    |                                             |                    |                    |           |        |
|------------------------------------|---------------------------------------------|--------------------|--------------------|-----------|--------|
|                                    | (Females)                                   |                    |                    |           |        |
|                                    | Daily occupation PA                         | 4086.56 (120.91)   | 2225.13 (107.11)   | -1861.4   | < 0.05 |
|                                    | Transportation PA                           | 1170.31 (37.37)    | 797.79 (34.23)     | - 372.52  | < 0.05 |
|                                    | Leisure time activities PA                  | 6980.94 (236.44)   | 8470.21 (235.12)   | + 1489.27 | < 0.05 |
|                                    | Sporting activities PA                      | 1918.87 (167.14)   | 1550.79 (97.97)    | - 368.08  | < 0.05 |
|                                    | Overall PA                                  | 14,156.68 (357.50) | 13,043.91 (310.87) | - 112.8   | < 0.05 |
|                                    | <i>PA phase 4 lockdown – MET-min/week</i>   |                    |                    |           |        |
|                                    | (All participants)                          |                    |                    |           |        |
|                                    | Daily occupation PA                         | 4328.27 (123.68)   | 2174.39 (98.25)    | - 2153.9  | < 0.05 |
|                                    | Transportation PA                           | 1149.50 (36.35)    | 812.57 (34.21)     | - 336.93  | < 0.05 |
|                                    | Leisure time activities PA                  | 6767.79 (206.00)   | 8622.59 (212.36)   | + 1854.8  | < 0.05 |
|                                    | Sporting activities PA                      | 1820.42 (141.94)   | 1749.32 (171.66)   | - 71.1    | > 0.05 |
|                                    | Overall PA                                  | 14,065.98 (335.14) | 13,358.87 (326.99) | - 707.11  | < 0.05 |
|                                    | (Males)                                     |                    |                    |           |        |
|                                    | Daily occupation PA                         | 5477.33 (294.99)   | 2699.65 (227.52)   | - 2777.7  | < 0.05 |
|                                    | Transportation PA                           | 1370.91 (84.69)    | 1008.81 (79.34)    | - 362.1   | < 0.05 |
|                                    | Leisure time activities PA                  | 7248.37 (511.78)   | 8009.67 (479.28)   | + 761.3   | > 0.05 |
|                                    | Sporting activities PA                      | 2437.01 (350.79)   | 2561.05 (338.68)   | +124.04   | > 0.05 |
|                                    | Overall PA                                  | 16,533.62 (912.29) | 14,279.18 (756.51) | - 2254.4  | < 0.05 |
|                                    | (Females)                                   |                    |                    |           |        |
|                                    | Daily occupation PA                         | 3940.03 (128.76)   | 1996.91 (105.84)   | - 1943.1  | < 0.05 |
|                                    | Transportation PA                           | 1074.70 (38.94)    | 746.27 (36.77)     | - 328.43  | < 0.05 |
|                                    | Leisure time activities PA                  | 6605.41 (214.51)   | 8829.68 (233.13)   | + 2224.27 | < 0.05 |
|                                    | Sporting activities PA                      | 1612.08 (147.68)   | 1475.05 (198.13)   | - 137.03  | > 0.05 |
|                                    | Overall PA                                  | 13,232.22 (319.70) | 13,047.91 (354.58) | - 184.31  | > 0.05 |
| Bourdas et al (2020b) <sup>c</sup> | <i>Daily occupational PA – MET-min/week</i> |                    |                    |           |        |
|                                    | All participants                            | 4502.7 (41.5)      | 2119.4 (32.1)      | - 2383.3  | < 0.05 |
|                                    | Males                                       | 5232.3 (72.8)      | 2552.2 (58.8)      | - 2680.1  | < 0.05 |
|                                    | Females                                     | 4049.6 (48.9)      | 1850.6 (36.7)      | - 2199.0  | < 0.05 |
|                                    | <i>Transportation PA – MET-min/week</i>     |                    |                    |           |        |
|                                    | All participants                            | 1277.7 (12.7)      | 751.6 (10.7)       | - 526.1   | < 0.05 |
|                                    | Males                                       | 1442.3 (22.3)      | 888.3 (19.4)       | - 554.0   | < 0.05 |
|                                    | Females                                     | 1174.4 (15.1)      | 666.7 (12.5)       | - 507.7   | < 0.05 |
|                                    | <i>Leisure time PA – MET-min/week</i>       |                    |                    |           |        |

|                           |                                              |                  |                  |          |        |
|---------------------------|----------------------------------------------|------------------|------------------|----------|--------|
|                           | All participants                             | 6266.6 (69.3)    | 7445.7 (70.2)    | + 1179.1 | < 0.05 |
|                           | Males                                        | 6186.7 (117.3)   | 7125.8 (118.0)   | + 939.1  | < 0.05 |
|                           | Females                                      | 6316.2 (85.5)    | 7644.3 (87.0)    | +1328.1  | < 0.05 |
|                           | <i>Sporting PA – MET-min/week</i>            |                  |                  |          |        |
|                           | All participants                             | 3114.3 (75.5)    | 2369.0 (68.8)    | - 745.3  | < 0.05 |
|                           | Males                                        | 4227.1 (166.4)   | 2874.4 (149.2)   | - 1352.7 | < 0.05 |
|                           | Females                                      | 2423.0 (63.8)    | 2055.1 (61.7)    | - 367.9  | < 0.05 |
|                           | <i>Total PA – MET-min/week</i>               |                  |                  |          |        |
|                           | All participants                             | 15160.6 (128.6)  | 12685.7 (120.0)  | - 2474.9 | < 0.05 |
|                           | Males                                        | 17088.2 (244.6)  | 13440.6 (237.4)  | - 3647.6 | < 0.05 |
|                           | Females                                      | 13963.2 (140.2)  | 12216.7 (126.6)  | - 1746.5 | < 0.05 |
|                           | (Age class)                                  |                  |                  |          |        |
|                           | 18-29 years old                              | 14406 (212.3)    | 12230.7 (226.3)  | - 2175.3 | < 0.05 |
|                           | 30-49 years old                              | 15668.9 (209.7)  | 12894.9 (168.0)  | - 2774.0 | < 0.05 |
|                           | 50-59 years old                              | 15833.7 (284.0)  | 13449.1 (248.4)  | - 2384.6 | < 0.05 |
|                           | 60-69 years old                              | 14402.3 (547.4)  | 11682.2 (596.0)  | - 2720.1 | < 0.05 |
|                           | 70 + years old                               | 12364.3 (1535.2) | 8472.6 (949.4)   | - 3891.7 | < 0.05 |
|                           | (BMI class)                                  |                  |                  |          |        |
|                           | Underweight (BMI <18.5)                      | 16626.9 (946.2)  | 14106.3 (1053.3) | - 2520.6 | < 0.05 |
|                           | Acceptable weight (BMI = 18.5-24.9)          | 15288.2 (174.0)  | 12720.7 (165.5)  | - 2567.5 | < 0.05 |
|                           | Overweight (BMI = 25.0-29.9)                 | 15022.1 (208.9)  | 12552.6 (196.4)  | - 2469.5 | < 0.05 |
|                           | Obese (BMI ≥ 30.0)                           | 14389.2 (412.7)  | 12381.8 (284.9)  | - 2607.4 | < 0.05 |
|                           | (Baseline PA level)                          |                  |                  |          |        |
|                           | Inactive (0 MET-min/week)                    | 10792.0 (170.7)  | 10477.3 (175.6)  | - 314.7  | > 0.05 |
|                           | Low PA (0-499 MET-min/week)                  | 10204.5 (179.0)  | 10446.0 (224.8)  | + 241.5  | > 0.05 |
|                           | Moderate PA (500-1000 MET-min/week)          | 10993.4 (184.2)  | 10691.1 (203.8)  | - 302.3  | > 0.05 |
|                           | High PA (>1000 MET-min/week)                 | 18876.3 (202.9)  | 14472.9 (193.3)  | - 4403.4 | < 0.05 |
| Bowes et al (2020)        | <i>Quantity of training - % participants</i> | NR               |                  | NR       | NR     |
|                           | Increased volume                             |                  | 5.7%             |          |        |
|                           | Decreased volume                             |                  | 75.7%            |          |        |
|                           | Same volume                                  |                  | 17.1%            |          |        |
|                           | Other                                        |                  | 1.4%             |          |        |
| Branley-Bell et al (2020) | <i>Change in PA - % participants</i>         | NR               |                  | NR       | NR     |
|                           | Much less PA                                 |                  | 27.9%            |          |        |
|                           | Moderately less PA                           |                  | 11.6%            |          |        |
|                           | Slightly less PA                             |                  | 10.1%            |          |        |

|                            |                                                                                                                                                                                                                                                                                                                                               |                                                                                                                                                         |                                                                                                                                                        |                                                                                                    |                                                                                                            |
|----------------------------|-----------------------------------------------------------------------------------------------------------------------------------------------------------------------------------------------------------------------------------------------------------------------------------------------------------------------------------------------|---------------------------------------------------------------------------------------------------------------------------------------------------------|--------------------------------------------------------------------------------------------------------------------------------------------------------|----------------------------------------------------------------------------------------------------|------------------------------------------------------------------------------------------------------------|
|                            | No change<br>Slightly more PA<br>Moderately more PA<br>Much more PA                                                                                                                                                                                                                                                                           |                                                                                                                                                         | 10.1%<br>12.4%<br>10.1%<br>14.0%                                                                                                                       |                                                                                                    |                                                                                                            |
| Buoite Stella et al (2020) | <i>Daily step count</i><br>All participants<br>People working as usual<br>People at home<br>People involved in structured PA<br>People not involved in structured PA<br><br><i>IPAQ-SF (MET)</i><br>All participants<br>People working as usual<br>People at home<br>People involved in structured PA<br>People not involved in structured PA | 8284 (4390)<br>11045 (5710)<br>7700 (3832)<br>8520 (4565)<br>7961 (4147)<br><br>3101 (3815)<br>2763 (2906)<br>3170 (3975)<br>3478 (3661)<br>2674 (3949) | 3294 (3994)<br>5043 (3289)<br>2924 (4040)<br>3139 (3237)<br>3505 (4854)<br><br>1839 (2254)<br>1732 (2099)<br>1861 (2287)<br>1767 (2041)<br>1920 (2477) | - 4990<br>- 6002<br>- 4776<br>- 5381<br>- 4456<br><br>- 1262<br>- 1031<br>- 1309<br>- 1711<br>-754 | < 0.001<br>< 0.001<br>< 0.001<br>< 0.001<br>< 0.001<br><br>< 0.001<br>0.001<br>< 0.001<br>< 0.001<br>0.004 |
| Callow et al (2020)        | <i>PA - % participants</i><br>Much lower<br>Somewhat lower<br>About the same<br>Somewhat greater<br>Much greater                                                                                                                                                                                                                              | NR                                                                                                                                                      | 14.2%<br>23.4%<br>35.7%<br>15.3%<br>9.0%                                                                                                               | NR                                                                                                 | NR                                                                                                         |
| Cancello et al (2020)      | <i>PA - % participants</i><br>Unchanged<br>More than usual<br>No activity<br>Less than usual<br><br>(Active before lockdown)<br>Increased<br>Decreased<br>Unchanged<br>Sedentary<br><br>(Inactive before lockdown)<br>Increased<br>Decreased<br>Unchanged                                                                                     | NR                                                                                                                                                      | 15.0%<br>22.0%<br>28.0%<br>35.0%<br><br>18.0%<br>50.0%<br>14.0%<br>18.0%<br><br>27.0%<br>0%<br>73.0%                                                   | NR                                                                                                 | NR                                                                                                         |



|                     | Sedentary                                                  |    | 0%                      |    |    |
|---------------------|------------------------------------------------------------|----|-------------------------|----|----|
| Caruso et al (2020) | PA - % participants<br>Increased<br>Unchanged<br>Decreased | NR | 18.7%<br>16.6%<br>64.6% | NR | NR |

|                                     |                                     |               |               |        |         |
|-------------------------------------|-------------------------------------|---------------|---------------|--------|---------|
| Castaneda-Babarro Coca et al (2020) | <i>Vigorous PA – time (min/day)</i> |               |               |        |         |
|                                     | All participants                    | 219 (196)     | 182 (184)     | - 37   | < 0.001 |
|                                     | Women                               | 175 (176)     | 159 (174)     | - 16   | < 0.001 |
|                                     | Men                                 | 256 (204)     | 202 (190)     | - 54   | < 0.001 |
|                                     | Workers                             | 212.1 (189.9) | 177.3 (179.4) | - 34.8 | < 0.001 |
|                                     | Students                            | 295.5 (221.0) | 223.7 (199.1) | - 71.8 | < 0.001 |
|                                     | Study-work                          | 223.6 (196.8) | 193.2 (195.2) | - 30.4 | < 0.001 |
|                                     | Nothing                             | 213.9 (228.4) | 179.6 (201.1) | - 34.3 | 0.013   |
|                                     | (age categories)                    |               |               |        |         |
|                                     | 18-24 years old                     | 300 (206.6)   | 246 (189.1)   | - 54   | < 0.001 |
|                                     | 25-34 years old                     | 244 (197.9)   | 201 (193.6)   | - 43   | < 0.001 |
|                                     | 35-44 years old                     | 209 (189.9)   | 175 (174.5)   | - 34   | < 0.001 |
|                                     | 45-54 years old                     | 202 (184.4)   | 171 (183.3)   | - 31   | < 0.001 |
|                                     | 55-65 years old                     | 199 (126)     | 155 (186.1)   | - 44   | < 0.001 |
|                                     | (Moderate PA categories)            |               |               |        |         |
|                                     | 0-150 min/week                      | 187 (176.6)   | 160 (168.3)   | - 27   | < 0.001 |
|                                     | 150-300 min/week                    | 234 (178.8)   | 196 (182.3)   | - 38   | < 0.001 |
|                                     | 300-450 min/week                    | 299 (220)     | 243 (210.8)   | - 56   | < 0.001 |
|                                     | >450 min/week                       | 409 (267.1)   | 292 (243.5)   | - 117  | < 0.001 |
|                                     | (Vigorous PA categories)            |               |               |        |         |
|                                     | 0-75 min/week                       | 16 (23.7)     | 71 (124.7)    | + 55   | < 0.001 |
|                                     | 75-150 min/week                     | 115 (21.6)    | 125 (116.2)   | + 10   | < 0.05  |
|                                     | 150-225 min/week                    | 188 (16.4)    | 172 (134.2)   | - 16   | < 0.01  |
|                                     | >225 min/week                       | 400 (170.7)   | 278 (203)     | - 122  | < 0.001 |
|                                     | <i>Moderate PA – time (min/day)</i> |               |               |        |         |
|                                     | All participants                    | 149 (174)     | 145 (170)     | - 4    | 0.102   |
|                                     | Women                               | 133 (160)     | 144 (159)     | + 11   | < 0.05  |
|                                     | Men                                 | 163 (185)     | 145 (179)     | - 18   | < 0.001 |
|                                     | Workers                             | 143 (169.2)   | 142.2 (170.6) | - 0.8  | 0.811   |
|                                     | Students                            | 171.1 (191.8) | 143.5 (157.1) | - 27.6 | < 0.05  |
|                                     | Study-work                          | 157.4 (177.1) | 144 (160.6)   | - 13.4 | 0.141   |
|                                     | Nothing                             | 198 (208.8)   | 184.6 (190.4) | - 13.4 | 0.316   |
| (age categories)                    |                                     |               |               |        |         |
| 18-24 years old                     | 180 (197.3)                         | 149 (154.6)   | - 31          | < 0.05 |         |
| 25-34 years old                     | 139 (150.3)                         | 145 (159.4)   | + 6           | 0.345  |         |
| 35-44 years old                     | 141 (176.6)                         | 140 (173.5)   | - 1           | 0.830  |         |

|  |                                 |               |               |         |         |
|--|---------------------------------|---------------|---------------|---------|---------|
|  | 45-54 years old                 | 150 (172.7)   | 142 (170.7)   | - 8     | 0.121   |
|  | 55-65 years old                 | 169 (191.7)   | 162 (184.3)   | - 7     | 0.405   |
|  | (Moderate PA categories)        |               |               |         |         |
|  | 0-150 min/week                  | 49 (50.5)     | 91 (199.6)    | + 42    | < 0.001 |
|  | 150-300 min/week                | 225 (45.2)    | 197 (156.4)   | - 28    | < 0.001 |
|  | 300-450 min/week                | 286 (39)      | 278 (204.7)   | - 8     | 0.709   |
|  | >450 min/week                   | 643 (146.2)   | 370 (266.1)   | - 273   | 0.010   |
|  | (Vigorous PA categories)        |               |               |         |         |
|  | 0-75 min/week                   | 101 (138.1)   | 127 (153.9)   | + 26    | < 0.001 |
|  | 75-150 min/week                 | 119 (120.9)   | 121 (132.8)   | + 2     | 0.596   |
|  | 150-225 min/week                | 136 (146)     | 128 (156.6)   | - 8     | 0.231   |
|  | >225 min/week                   | 196 (208)     | 171 (193.7)   | - 25    | < 0.001 |
|  | <i>Walking – time (min/day)</i> |               |               |         |         |
|  | All participants                | 282 (253)     | 116 (189.3)   | - 166   | < 0.001 |
|  | Women                           | 302 (260)     | 122 (199.3)   | - 180   | < 0.001 |
|  | Men                             | 265 (247)     | 110 (180.1)   | - 155   | < 0.001 |
|  | Workers                         | 269.3 (246.2) | 113.7 (182.7) | - 155.6 | < 0.001 |
|  | Students                        | 298.8 (246.1) | 98.8 (189.7)  | - 200   | < 0.001 |
|  | Study-work                      | 301.3 (249.5) | 106.1 (179.6) | - 195.2 | < 0.001 |
|  | Nothing                         | 403.3 (326.3) | 186.6 (267.2) | - 216.6 | < 0.001 |
|  | (age categories)                |               |               |         |         |
|  | 18-24 years old                 | 321 (281.8)   | 94 (182.6)    | - 227   | < 0.001 |
|  | 25-34 years old                 | 280 (244.2)   | 97 (161.1)    | - 183   | < 0.001 |
|  | 35-44 years old                 | 253 (235.8)   | 108 (186.8)   | - 145   | < 0.001 |
|  | 45-54 years old                 | 285 (256.1)   | 125 (197.8)   | - 160   | < 0.001 |
|  | 55-65 years old                 | 354 (284.1)   | 160 (213.2)   | - 194   | < 0.001 |
|  | (Moderate PA categories)        |               |               |         |         |
|  | 0-150 min/week                  | 254 (239.6)   | 102 (180)     | - 152   | < 0.001 |
|  | 150-300 min/week                | 309 (252.3)   | 121 (181.9)   | - 188   | < 0.001 |
|  | 300-450 min/week                | 340 (272.8)   | 167 (234.5)   | - 173   | < 0.001 |
|  | >450 min/week                   | 407 (308)     | 179 (227)     | - 228   | < 0.001 |
|  | (Vigorous PA categories)        |               |               |         |         |
|  | 0-75 min/week                   | 291 (269.1)   | 127 (211.8)   | - 164   | < 0.001 |
|  | 75-150 min/week                 | 248 (219.5)   | 93 (155.7)    | - 155   | < 0.001 |
|  | 150-225 min/week                | 256 (226.2)   | 93 (153.8)    | - 163   | < 0.001 |

|                         |                                                                                                                                                                                                                                                          |                                                                         |                                                                       |                                                  |                  |
|-------------------------|----------------------------------------------------------------------------------------------------------------------------------------------------------------------------------------------------------------------------------------------------------|-------------------------------------------------------------------------|-----------------------------------------------------------------------|--------------------------------------------------|------------------|
|                         | >225 min/week                                                                                                                                                                                                                                            | 299 (264.1)                                                             | 126 (197.5)                                                           | - 173                                            | < 0.001          |
| Castellini et al (2020) | <i>Compensatory physical exercise score</i><br>Females with eating disorders<br>Females without eating disorders                                                                                                                                         | 0.69 (1.84)<br>0.58 (3.33)                                              | 3.55 (7.72)<br>0.84 (3.47)                                            | + 2.86<br>+ 0.26                                 | < 0.05<br>> 0.05 |
| Constandt et al (2020a) | <i>Exercise - % participants</i><br>Decreased<br>Unchanged<br>Increased<br><br><i>Walking - % participants</i><br>Decreased<br>Unchanged<br>Increased                                                                                                    | NR                                                                      | 45.4%<br>43.3%<br>11.3%<br><br>60%<br>32.2%<br>7.8%                   | NR                                               | NR               |
| Constant et al (2020b)  | <i>Exercise - % of population (active group)</i><br>More<br>As much<br>Less<br><br><i>Exercise - % population (inactive group)</i><br>More<br>As much<br>Less<br>No exercise                                                                             | NR                                                                      | 36%<br>23%<br>46%<br><br>58%<br>5%<br>7%<br>40%                       | NR                                               | NR               |
| Di Corrado et al (2020) | <i>Active before lockdown - % participants</i><br>Active at home during lockdown<br>Not active at home during lockdown<br><br><i>Not active before lockdown - % participants</i><br>Active at home during lockdown<br>Not active at home during lockdown | 100%<br>100%<br><br>0%<br>0%                                            | 85.29%<br>14.71%<br><br>49.36%<br>50.64%                              | - 14.71%<br>- 85.29%<br><br>+ 49.36%<br>+ 50.64% | NR               |
| Di Stefano et al (2020) | <i>Vigorous PA - MET-min/week</i><br>Neuromuscular disease participants<br>Carers or partners<br><br><i>Moderate PA - MET-min/week</i><br>Neuromuscular disease participants<br>Carers or partners                                                       | 70.1 (361.9)<br>2081.8 (4945.3)<br><br>263.2 (606.9)<br>1153.3 (2424.6) | 37.1 (303.9)<br>861.9 (1662.9)<br><br>146.9 (450.6)<br>925.4 (3675.6) | - 227.9<br>- 696.6<br><br>- 33<br>- 116.3        | NR               |

|                                 |                                                                                                                                                                                                                                                                                               |                                           |                                                                                               |                         |                               |
|---------------------------------|-----------------------------------------------------------------------------------------------------------------------------------------------------------------------------------------------------------------------------------------------------------------------------------------------|-------------------------------------------|-----------------------------------------------------------------------------------------------|-------------------------|-------------------------------|
|                                 | <i>Walking – MET-min/week</i><br>Neuromuscular disease participants<br>Carers or partners                                                                                                                                                                                                     | 547.7 (733.2)<br>1271.5 (2703.6)          | 211.9 (534)<br>2703.6 (574.9)                                                                 | - 2144.2<br>- 1448.4    |                               |
|                                 | <i>Total PA – MET-min/week</i><br>Neuromuscular disease participants<br>Carers or partners                                                                                                                                                                                                    | 901.3 (1299.6)<br>4506.5 (7600.1)         | 400.6 (1088.5)<br>2362.3 (4498.9)                                                             | - 149.3<br>- 1219.9     |                               |
|                                 | <i>MVPA – MET-min/week</i><br>Neuromuscular disease participants<br>Carers or partners                                                                                                                                                                                                        | 333.3 (483.8)<br>3235.7 (3684.7)          | 184 (440.3)<br>1787.3 (2669.3)                                                                | - 335.8<br>- 500.7      |                               |
| Dogas et al (2020)              | <i>Exercise frequency – per week</i><br>All participants<br>Males<br>Females                                                                                                                                                                                                                  | 2.8 (1.1)<br>2.8 (1.1)<br>2.8 (1.0)       | 2.6 (1.2)<br>2.7 (1.2)<br>2.7 (1.2)                                                           | - 0.2<br>- 0.1<br>- 0.1 | < 0.001<br>0.453<br>0.001     |
|                                 | <i>Exercise duration – minutes</i><br>All participants<br>Males<br>Females                                                                                                                                                                                                                    | 57.9 (34.5)<br>61.2 (40.1)<br>55.6 (29.8) | 51.1 (37.7)<br>59.2 (55.9)<br>49.2 (32.5)                                                     | - 6.8<br>- 2<br>- 6.4   | < 0.001<br>> 0.999<br>< 0.001 |
| Elran-Barak and Mozeikov (2020) | <i>PA – times/week</i>                                                                                                                                                                                                                                                                        | 3.5 (2.4)                                 | 2.8 (2.4)                                                                                     | - 0.7                   | < 0.001                       |
| Endstrasser et al (2020)        | <i>Tegner Activity Score</i>                                                                                                                                                                                                                                                                  | 3                                         | 2                                                                                             | - 1                     | p = 0.046                     |
| Ernstsen et al (2020)           | <i>Change in PA - % participants</i><br><br><i>(All participants)</i><br>Reduced<br>Unchanged<br>Increased<br><br><i>(Participants with anxiety disorder)</i><br>Reduced<br>Unchanged<br>Increased<br><br><i>(Participants without anxiety disorder)</i><br>Reduced<br>Unchanged<br>Increased | NR                                        | <br><br>13.8%<br>64.3%<br>21.9%<br><br>25.2%<br>57.4%<br>17.4%<br><br>12.7%<br>65.0%<br>22.3% | NR                      | NR                            |

|                       |                                                                                                                                                                                                                                                              |                                           |                                                        |                                                         |                                                               |
|-----------------------|--------------------------------------------------------------------------------------------------------------------------------------------------------------------------------------------------------------------------------------------------------------|-------------------------------------------|--------------------------------------------------------|---------------------------------------------------------|---------------------------------------------------------------|
|                       | (Participants with depressive disorder)<br>Reduced<br>Unchanged<br>Increased<br><br>(Participants without depressive disorder)<br>Reduced<br>Unchanged<br>Increased                                                                                          |                                           | 33.3%<br>62.7%<br>13.7%<br><br>13.0%<br>64.4%<br>22.2% |                                                         |                                                               |
| Galle et al (2020a)   | Physical activity - % population<br>Decreased<br>Increased<br>Active as before<br>Inactive as before                                                                                                                                                         | NR                                        | 48.6%<br>21.3%<br>16.0%<br>14.1%                       | NR                                                      | NR                                                            |
| Galle et al (2020b)   | PA – min/day<br>Total PA <sup>b</sup><br>Vigorous PA<br>Moderate PA<br>Walking                                                                                                                                                                               | 520 (820)<br>138.6<br>199.3<br>480.0      | 270 (340)<br>108.3<br>148.1<br>144.5                   | - 250<br>- 30.3<br>- 51.2<br>- 365.5                    | NR<br>< 0.05<br>< 0.05<br>< 0.05                              |
| Gallo et al (2020)    | Walking – min/day<br>All participants (compared with 2019)<br>All participants (compared with 2018)<br>Females (compared with 2019)<br>Females (compared with 2018)<br><br>Vigorous PA – min/day<br>Males (compared with 2019)<br>Males (compared with 2018) | NR                                        | NR                                                     | - 52.5<br>- 87.5<br>- 30<br>- 30<br><br>- 60.0<br>- 150 | < 0.05<br>< 0.001<br>< 0.05<br>0.068<br><br>< 0.05<br>< 0.001 |
| Gilic et al (2020)    | PA – PAQ-A score<br>All participants<br>Boys<br>Girls                                                                                                                                                                                                        | 2.98 (0.71)<br>3.12 (0.56)<br>2.69 (0.49) | 2.31 (0.68)<br>2.50 (0.44)<br>1.95 (0.56)              | - 0.67<br>- 0.62<br>- 0.74                              | < 0.001<br>< 0.001<br>< 0.001                                 |
| Giustino et al (2020) | Physical Activity<br>MET-min/week<br><br>Number participants                                                                                                                                                                                                 | 3458.0                                    | 1994.3                                                 | - 1463.5                                                | p < 0.001                                                     |

|                             |                                                                                                                                                                                            |                                                |                                              |                                                                    |                    |
|-----------------------------|--------------------------------------------------------------------------------------------------------------------------------------------------------------------------------------------|------------------------------------------------|----------------------------------------------|--------------------------------------------------------------------|--------------------|
|                             | Low Active<br>Moderately Active<br>High Active                                                                                                                                             | 49<br>352<br>401                               | 200<br>409<br>193                            | + 19%<br>+ 7%<br>- 26%                                             | NR                 |
| He et al (2020)             | Steps – per day<br>Males<br>Females                                                                                                                                                        | 8321 (3000)<br>7038 (1923)                     | 3728 (1726)<br>3741 (1042)                   | - 4593<br>- 3297                                                   | < 0.001<br>< 0.001 |
| Husain and Ashkanani (2020) | PA hours per week - % participants<br>< 1h or none<br>1-2h per week<br>3-4h per week<br>>4h per week                                                                                       | 48.9%<br>20.2%<br>14.7%<br>16.1%               | 61.9%<br>18.1%<br>11.8%<br>8.2%              | + 13%<br>- 2.1%<br>- 2.9%<br>- 7.9%                                | NR                 |
| Ingram et al (2020)         | Change in PA - % participants<br>A lot less<br>A little less<br>Same<br>A little more<br>A lot more                                                                                        | NR                                             | NR                                           | 24.8%<br>22.6%<br>16.8%<br>23.6%<br>12.3%                          | NR                 |
| Karuc et al (2020)          | MVPA – min/day <sup>b</sup><br>Females<br>Males<br><br>Change in PA - % participants<br>(Females)<br>No change<br>Increase<br>Decrease<br><br>(Males)<br>No change<br>Increase<br>Decrease | 120 (227.1)<br>135 (127.5)<br><br>NR<br><br>NR | 64.3 (75)<br>85.7 (56.8)<br><br>NR<br><br>NR | - 55.7<br>- 49.3<br><br>25%<br>19%<br>56%<br><br>31%<br>19%<br>50% | NR                 |
| Knell et al (2020)          | Change in PA - % participants<br>Increase<br>Decrease<br>Stay the same                                                                                                                     | NR                                             | 25.2%<br>39.0%<br>35.8%                      | NR                                                                 | NR                 |
| Kriaucioniene et al (2020)  | Change in PA - % participants<br>Increase<br>Decrease                                                                                                                                      | NR                                             | 14.3%<br>60.6%                               | NR                                                                 | NR                 |

|                           |                                                                                                                                                                                                                     |                                                                                                                                                                                         |                                                                                                                                                                                         |                                                                                                            |                                                                                                                       |
|---------------------------|---------------------------------------------------------------------------------------------------------------------------------------------------------------------------------------------------------------------|-----------------------------------------------------------------------------------------------------------------------------------------------------------------------------------------|-----------------------------------------------------------------------------------------------------------------------------------------------------------------------------------------|------------------------------------------------------------------------------------------------------------|-----------------------------------------------------------------------------------------------------------------------|
|                           | Stay the same                                                                                                                                                                                                       |                                                                                                                                                                                         | 19.3%                                                                                                                                                                                   |                                                                                                            |                                                                                                                       |
| Lopez-Bueno et al (2020a) | <i>PA – min/week</i><br>All participants<br>Males<br>Females<br>Age < 43 years old<br>Age > 43 years old<br>Married<br>Not married<br>Without University degree<br>With University degree<br>Employed<br>Unemployed | 221.9 (193.6)<br>268.8 (207.1)<br>182.0 (171.7)<br>238.4 (201.4)<br>182.4 (167.3)<br>210.1 (187.6)<br>233.2 (198.8)<br>217.2 (180.7)<br>221.9 (180.7)<br>205.0 (180.0)<br>251.0 (212.0) | 176.7 (178.9)<br>196.0 (185.0)<br>160.4 (171.2)<br>196.4 (181.9)<br>129.6 (162.4)<br>161.4 (170.6)<br>191.4 (185.5)<br>181.3 (174.4)<br>168.8 (186.4)<br>165.6 (168.7)<br>195.6 (193.7) | - 45.2<br>- 72.8<br>- 21.6<br>- 42.0<br>- 52.8<br>- 48.7<br>- 41.8<br>- 35.9<br>- 53.1<br>- 39.4<br>- 55.4 | < 0.001<br>< 0.001 |
| Lopez-Bueno et al (2020b) | <i>PA &lt; 150min/week - % participants</i><br>1 week of lockdown<br>2 weeks of lockdown<br>3 weeks of lockdown                                                                                                     | 35.1%<br>35.1%<br>35.1%                                                                                                                                                                 | 52.2%<br>40.3%<br>26.2%                                                                                                                                                                 | + 17.1%<br>+ 5.2%<br>- 8.9%                                                                                | < 0.001*                                                                                                              |
| Mandelkorn et al (2020)   | <i>Change in PA - % population</i><br><br>(All Countries)<br>No Change<br>More<br>Less<br><br>(USA only)<br>No change<br>More<br>Less                                                                               | NR                                                                                                                                                                                      | 20.41%<br>17.84%<br>61.75%<br><br>29.76%<br>22.55%<br>47.68%                                                                                                                            | NR                                                                                                         | NR                                                                                                                    |
| Maugeri et al (2020)      | <i>PA – MET-min/week</i><br>Total PA<br>Vigorous PA<br>Moderate PA<br>Walking<br><br><i>Total PA – MET-min/week</i><br>Males<br>Female<br>Young (< 21 years old)                                                    | 2429<br>1109<br>574<br>746<br><br>2998<br>1994<br>2726                                                                                                                                  | - 852<br>- 342.4<br>- 50.7<br>- 458.4<br><br>- 1244<br>- 551<br>- 874                                                                                                                   | NR                                                                                                         | < 0.001<br>< 0.001<br>0.0188<br>< 0.001<br><br>< 0.001<br>< 0.001<br>< 0.001                                          |



|                    |                                                                                                                                                                                                                                                                                                                                                                                                                                                                                                                                     |      |                                                                                                                                                                                                 |    |         |
|--------------------|-------------------------------------------------------------------------------------------------------------------------------------------------------------------------------------------------------------------------------------------------------------------------------------------------------------------------------------------------------------------------------------------------------------------------------------------------------------------------------------------------------------------------------------|------|-------------------------------------------------------------------------------------------------------------------------------------------------------------------------------------------------|----|---------|
|                    | Young adults (21-40 years old)                                                                                                                                                                                                                                                                                                                                                                                                                                                                                                      | 2535 | - 871                                                                                                                                                                                           |    | < 0.001 |
|                    | Adults (41-60 years old)                                                                                                                                                                                                                                                                                                                                                                                                                                                                                                            | 2150 | - 811                                                                                                                                                                                           |    | < 0.001 |
|                    | Adults (≥ 60 years old)                                                                                                                                                                                                                                                                                                                                                                                                                                                                                                             | 2316 | - 843                                                                                                                                                                                           |    | < 0.001 |
| Meyer et al (2020) | <i>Weekly physical activity - % population</i><br><i>Previously active</i><br><i>Previously inactive</i>                                                                                                                                                                                                                                                                                                                                                                                                                            | NR   | -32.3%<br>+2.3%                                                                                                                                                                                 | NR | NR      |
| Mitra et al (2020) | <i>Walk or bike - % participants</i><br>(All participants)<br>Decrease<br>Same<br>Increase<br><br>(Children aged 5-11)<br>Decrease<br>Same<br>Increase<br><br>(Youth aged 12-17)<br>Decrease<br>Same<br>Increase<br><br><i>PA or sport inside - % participants</i><br>(All participants)<br>Decrease<br>Same<br>Increase<br><br>(Children aged 5-11)<br>Decrease<br>Same<br>Increase<br><br>(Youth aged 12-17)<br>Decrease<br>Same<br>Increase<br><br><i>PA or sport outside - % participants</i><br>(All participants)<br>Decrease | NR   | 53.2%<br>26.3%<br>20.5%<br><br>47.3%<br>25.0%<br>27.7%<br><br>58.4%<br>27.6%<br>14.0%<br><br>34.0%<br>40.5%<br>25.5%<br><br>27.1%<br>41.7%<br>31.2%<br><br>40.1%<br>39.4%<br>20.5%<br><br>63.8% | NR | NR      |

|  |                                          |  |       |  |  |
|--|------------------------------------------|--|-------|--|--|
|  | Same                                     |  | 22.2% |  |  |
|  | Increase                                 |  | 14.0% |  |  |
|  | (Children aged 5-11)                     |  |       |  |  |
|  | Decrease                                 |  | 29.0% |  |  |
|  | Same                                     |  | 22.7% |  |  |
|  | Increase                                 |  | 18.3% |  |  |
|  | (Youth aged 12-17)                       |  |       |  |  |
|  | Decrease                                 |  | 68.0% |  |  |
|  | Same                                     |  | 21.8% |  |  |
|  | Increase                                 |  | 10.1% |  |  |
|  | <i>Playing outside - % participants</i>  |  |       |  |  |
|  | (All participants)                       |  |       |  |  |
|  | Decrease                                 |  | 51.2% |  |  |
|  | Same                                     |  | 30.9% |  |  |
|  | Increase                                 |  | 17.9% |  |  |
|  | (Children aged 5-11)                     |  |       |  |  |
|  | Decrease                                 |  | 47.5% |  |  |
|  | Same                                     |  | 26.3% |  |  |
|  | Increase                                 |  | 26.3% |  |  |
|  | (Youth aged 12-17)                       |  |       |  |  |
|  | Decrease                                 |  | 54.6% |  |  |
|  | Same                                     |  | 35.0% |  |  |
|  | Increase                                 |  | 10.4% |  |  |
|  | <i>Household chores - % participants</i> |  |       |  |  |
|  | (All participants)                       |  |       |  |  |
|  | Decrease                                 |  | 8.2%  |  |  |
|  | Same                                     |  | 53.9% |  |  |
|  | Increase                                 |  | 37.9% |  |  |
|  | (Children aged 5-11)                     |  |       |  |  |
|  | Decrease                                 |  | 7.2%  |  |  |
|  | Same                                     |  | 53.2% |  |  |
|  | Increase                                 |  | 39.5% |  |  |
|  | (Youth aged 12-17)                       |  |       |  |  |
|  | Decrease                                 |  | 9.1%  |  |  |

|                           |                                                                                                                                                                                                  |                                                                                          |                                                                                            |                                                              |                                                                         |
|---------------------------|--------------------------------------------------------------------------------------------------------------------------------------------------------------------------------------------------|------------------------------------------------------------------------------------------|--------------------------------------------------------------------------------------------|--------------------------------------------------------------|-------------------------------------------------------------------------|
|                           | Same Increase                                                                                                                                                                                    |                                                                                          | 54.4%<br>36.5%                                                                             |                                                              |                                                                         |
| Mon-Lopez et al (2020a)   | <i>Training days per week – frequency</i><br>All participants<br>Males<br>Females<br><br><i>Training – hours/week</i><br>All participants<br>Males<br>Females                                    | 4.84 (1.15)<br>4.69 (1.2)<br>5.12 (1.0)<br><br>9.99 (3.8)<br>9.34 (3.63)<br>11.18 (3.83) | 4.23 (1.69)<br>3.98 (1.69)<br>4.68 (1.61)<br><br>5.27 (3.26)<br>4.89 (3.15)<br>5.97 (3.36) | - 0.61<br>- 0.71<br>- 0.44<br><br>- 4.72<br>- 4.45<br>- 5.21 | < 0.001<br>< 0.001<br>< 0.001<br><br>< 0.001<br>< 0.001<br>< 0.003      |
| Mon-Lopez et al (2020b)   | <i>PA – METs</i><br>High intensity PA<br>Moderate intensity PA<br>Low intensity PA<br>Total PA                                                                                                   | 1660 (2714.55)<br>683.67 (130.95)<br>1427.53 (1852.27)<br>3771.19 (400.53)               | 884.67 (1200.3)<br>464.33 (602.03)<br>1852.27 (274.73)<br>1623.73 (1658.85)                | - 775.33<br>- 219.34<br>- 1152.8<br>- 2147.46                | 0.001<br>0.042<br>< 0.001<br>< 0.001                                    |
| Munasinghe et al (2020)   | <i>PA - (Yes-no)</i><br>Yes                                                                                                                                                                      | 51.4%                                                                                    | 43.6%                                                                                      | -7.8%                                                        | NR                                                                      |
| Muriel et al (2020)       | <i>PA – hours/week</i><br>Total training<br>Z1. Recovery<br>Z2. Endurance<br>Z3. Tempo<br>Z4. Threshold<br>Z5. VO2 max<br>Z6. Anaerobic                                                          | 17.7 (3.6)<br>5.0 (1.9)<br>3.1 (1.0)<br>3.1 (1.0)<br>2.5 (0.7)<br>1.7 (0.6)<br>2.3 (1.1) | 11.7 (3.9)<br>2.4 (1.7)<br>3.5 (1.9)<br>2.3 (1.1)<br>1.4 (0.7)<br>1.0 (0.5)<br>1.1 (0.8)   | - 6.0<br>- 2.6<br>+ 0.4<br>- 0.8<br>- 1.1<br>- 0.7<br>- 1.2  | < 0.001<br>< 0.001<br>0.378<br>< 0.001<br>< 0.001<br>< 0.001<br>< 0.001 |
| Pellegrini et al (2020)   | <i>Exercise - % participants</i><br>I never practice exercise<br>Exercise is less than before quarantine<br>Exercise is the same as before quarantine<br>Exercise is more than before quarantine | NR                                                                                       | 32.6%<br>46.7%<br>10.0%<br>10.7%                                                           | NR                                                           | NR                                                                      |
| Pietrobelli et al. (2020) | <i>Sports time</i><br><i>Hours/week</i>                                                                                                                                                          | 3.6 (4.3)                                                                                | 1.3 (1.4)                                                                                  | - 2.30                                                       | 0.003                                                                   |
| Pillay, L et al (2020)    | <i>Training load and intensity decreased - % sample</i><br>Yes<br>No                                                                                                                             | NR                                                                                       | 75%<br>25%                                                                                 | NR                                                           | NR                                                                      |

|                            |                                                                                                                                                                                                                                                                                            |                                                                                              |                                                                                                                                                                                                                                                          |                                                                |                                                                                                      |
|----------------------------|--------------------------------------------------------------------------------------------------------------------------------------------------------------------------------------------------------------------------------------------------------------------------------------------|----------------------------------------------------------------------------------------------|----------------------------------------------------------------------------------------------------------------------------------------------------------------------------------------------------------------------------------------------------------|----------------------------------------------------------------|------------------------------------------------------------------------------------------------------|
| Robinson et al (2020)      | <p><i>Exercise - % participants</i></p> <p>A lot less<br/>Less<br/>A little less<br/>Same<br/>A little more<br/>More<br/>A lot more</p> <p><i>PA (e.g. gardening) - % participants</i></p> <p>A lot less<br/>Less<br/>A little less<br/>Same<br/>A little more<br/>More<br/>A lot more</p> | NR                                                                                           | <p>11.0%<br/>14.0%<br/>15.0%<br/>15.0%<br/>20.0%<br/>15.0%<br/>10.0%</p> <p>10.0%<br/>12.0%<br/>12.0%<br/>21.0%<br/>24.0%<br/>16.0%<br/>6.0%</p>                                                                                                         | NR                                                             | NR                                                                                                   |
| Rogers et al (2020)        | <p>PA Change during lockdown - % participants</p> <p>Same<br/>Less<br/>More</p>                                                                                                                                                                                                            | NR                                                                                           | <p>63.9%<br/>25.05%<br/>11.06%</p>                                                                                                                                                                                                                       | NR                                                             | <0.001                                                                                               |
| Romero-Blanco et al (2020) | <p><i>PA – days/week</i></p> <p>Vigorous PA<br/>Moderate</p> <p><i>PA – min/week</i></p> <p>Vigorous PA<br/>Moderate PA<br/>Total PA</p>                                                                                                                                                   | <p>0.98 (1.33)<br/>1.74 (1.56)</p> <p>28.47 (54.16)<br/>42.81 (48.44)<br/>223.3 (305.47)</p> | <p>1.33 (2.19)<br/>3.15 (2.05)</p> <p>30.66 (30.94)<br/>47.74 (50.8)<br/>383.17 (438.9)</p>                                                                                                                                                              | <p>+ 1.12<br/>+ 1.41</p> <p>+ 2.19<br/>+ 4.93<br/>+ 159.87</p> | <p>&lt; 0.001<br/>&lt; 0.001</p> <p>0.45<br/>0.19<br/>&lt; 0.001</p>                                 |
| Ruiz-Ruso et al (2020a)    | <p><i>Change in weekly PA</i></p>                                                                                                                                                                                                                                                          | NR                                                                                           | <p>In text - 'During the COVID-19 lockdown, we noticed a significant increase in the daily hours that the participants of the study were sitting without doing any physical activity at all (Figure 5). Regarding the average minutes per week spent</p> | NR                                                             | <p>Mean walking time<br/>p=&lt;0.0001</p> <p>Mean time spent in moderate activity<br/>p=&lt;0.05</p> |

|                              |                                                                                                                          |                                                                                         |                                                                                                       |                                                    |                                                       |
|------------------------------|--------------------------------------------------------------------------------------------------------------------------|-----------------------------------------------------------------------------------------|-------------------------------------------------------------------------------------------------------|----------------------------------------------------|-------------------------------------------------------|
|                              |                                                                                                                          |                                                                                         | walking, we observed a significant decrease during lockdown compared to the period before.'           |                                                    |                                                       |
| Ruiz-Ruso et al (2020b)      | <i>Change in PA levels - % participants</i><br>Active                                                                    | 27.0%                                                                                   | 20.5%                                                                                                 | -6.5%                                              | NR                                                    |
| Sanchez-Sanchez et al (2020) | <i>Change in weekly PA - % participants</i><br>1-3 times/week<br>4-5 times/week<br>≥ 6 times/week<br>No PA               | 35.4%<br>27.9%<br>7.9%<br>28.8%                                                         | 32.3%<br>23.7%<br>14.5%<br>29.4%                                                                      | - 3.1<br>- 4.2<br>+ 6.6<br>+ 0.6                   | NR                                                    |
| Sankar et al (2020)          | <i>Change in PA - % participants</i><br>Increased<br>Decreased<br>Same                                                   | NR                                                                                      | 2.7%<br>14.5%<br>82.7%                                                                                | NR                                                 | NR                                                    |
| Sanudo et al (2020)          | <i>PA – min/week</i><br>Walking<br>Moderate PA<br>Vigorous PA<br>MVPA<br><br><i>Steps – per day</i>                      | 362 (262)<br>411 (487)<br>256 (381)<br>797 (822)<br><br>8525 (3597)                     | 27 (47)<br>178 (155)<br>168 (228)<br>346 (341)<br><br>2754 (1724)                                     | - 335<br>- 263<br>- 88<br>- 451<br><br>- 5771      | < 0.01<br>0.028<br>0.006<br>0.006<br><br>< 0.001      |
| Savage et al (2020)          | <i>Moderate and vigorous PA</i>                                                                                          | NR                                                                                      | In text - PA decreased significantly over time (p<.010, however the effect size was trivial (d=0.12). | NR                                                 | < 0.01                                                |
| Schlichtiger et al (2020a)   | <i>Change in PA - % participants</i><br>Reduced PA<br>Constant PA<br>Increased PA                                        | NR                                                                                      | 44.1%<br>22.6%<br>19.8%                                                                               | NR                                                 | NR                                                    |
| Schlichtiger et al (2020b)   | <i>PA – MET hours/week</i><br>Total PA<br>Household PA<br>Yard work<br>Leisure activities<br>Sports<br>Work/volunteering | 168.8 (91.0)<br>52.2 (33.6)<br>14.5 (20.4)<br>20.0 (16.4)<br>40.6 (54.7)<br>41.6 (53.0) | 144.1 (84.8)<br>50.5 (31.8)<br>16.4 (22.3)<br>16.4 (15.9)<br>27.6 (35.7)<br>33.1 (52.1)               | - 24.7<br>- 1.7<br>+ 1.9<br>- 3.6<br>- 13<br>- 8.5 | < 0.01<br>0.102<br>0.038<br>0.014<br>0.001<br>< 0.001 |

|                                 |                                          |        |        |          |         |
|---------------------------------|------------------------------------------|--------|--------|----------|---------|
| Srivastav et al (2020)          | <i>PA – MET-min/week</i>                 |        |        |          |         |
|                                 | Vigorous PA                              | 2727.3 | 1165.2 | - 1562.1 | < 0.001 |
|                                 | Moderate PA                              | 1994.3 | 728.2  | - 1266.1 | < 0.001 |
|                                 | Walking                                  | 3088.3 | 2242.3 | - 845.9  | < 0.001 |
|                                 | Total PA                                 | 8142.7 | 5390.9 | - 2751.8 | < 0.001 |
|                                 | Total PA without sitting                 | 7809.7 | 4135.7 | - 3674.0 | < 0.001 |
| Vetrovsky et al (2020)          | <i>Changes in steps - % participants</i> | NR     | NR     | - 16.2%  | < 0.001 |
| Wang et al (2020)               | <i>Exercise - % participants</i>         | NR     |        | NR       | NR      |
|                                 | Reduced                                  |        | 52%    |          |         |
|                                 | Increased                                |        | 17%    |          |         |
|                                 | <i>Daily PA - % participants</i>         |        |        |          |         |
|                                 | Reduced                                  |        | 44%    |          |         |
|                                 | Increased                                |        | 19%    |          |         |
| Yang et al (2020a) <sup>b</sup> | <i>Active transport – hours/day</i>      |        |        |          |         |
|                                 | High School Students (< 18 years old)    | 1.5    | 1.0    | - 0.5    | < 0.05  |
|                                 | Undergraduate Students                   | 1.3    | 1.0    | - 0.3    | < 0.001 |
|                                 | Graduate students                        | 1.0    | 0.5    | - 0.5    | < 0.05  |
|                                 | All participants                         | 1.3    | 1.0    | - 0.3    | < 0.05  |
|                                 | <i>Housework activity – hours/day</i>    |        |        |          |         |
|                                 | High School Students (< 18 years old)    | 2.0    | 2.3    | + 0.3    | < 0.001 |
|                                 | Undergraduate Students                   | 1.5    | 2.0    | + 0.5    | < 0.001 |
|                                 | Graduate students                        | 1.0    | 1.1    | + 0.1    | > 0.05  |
|                                 | All participants                         | 2.0    | 2.0    | 0        | < 0.05  |
|                                 | <i>MVPA – hours/day</i>                  |        |        |          |         |
|                                 | High School Students (< 18 years old)    | 1.5    | 1.5    | 0        | < 0.05  |
|                                 | Undergraduate Students                   | 1.1    | 1.0    | -0.1     | < 0.05  |
|                                 | Graduate students                        | 1.0    | 1.0    | 0        | > 0.05  |
|                                 | All participants                         | 1.3    | 1.2    | -0.1     | < 0.001 |
|                                 | <i>Walking for leisure – hours/day</i>   |        |        |          |         |
|                                 | High School Students (< 18 years old)    | 1.0    | 1.0    | 0        | < 0.01  |
|                                 | Undergraduate Students                   | 1.0    | 0.8    | - 0.2    | < 0.001 |
| Graduate students               | 1.0                                      | 1.0    | 0      | > 0.05   |         |
| All participants                | 1.0                                      | 1.0    | 0      | < 0.001  |         |
| Yang et al (2020b)              | <i>PA – MET-min/week</i>                 |        |        |          |         |

|                    |                                   |               |                |         |         |
|--------------------|-----------------------------------|---------------|----------------|---------|---------|
|                    | Total PA                          | 3323 (2451)   | 2718 (2205)    | - 605   | < 0.001 |
|                    | <i>PA – min/day</i>               |               |                |         |         |
|                    | Moderate PA                       | 57.15 (42.67) | 46.77 (41.37)  | - 10.38 | < 0.01  |
|                    | Vigorous PA                       | 47.94 (41.91) | 39.47 (40.0)   | - 8.47  | < 0.001 |
|                    | Active PA                         | 157.8 (92.73) | 134.45 (90.89) | - 23.35 | 0.003   |
|                    | Walking                           | 52.71 (47.7)  | 48.21 (44.41)  | - 4.5   | 0.067   |
| Zenic et al (2020) | <i>Change in PA – PAQ-A Score</i> |               |                |         |         |
|                    | All participants                  | 2.97 (0.61)   | 2.63 (0.68)    | - 0.34  | < 0.01  |

NR, Not reported; MVPA, moderate-to-vigorous physical activity; METs, Metabolic Equivalent Tasks

<sup>a</sup> Numeric data provided by authors via email, from figure 2 in original manuscript.

<sup>b</sup> Data reported as median (interquartile range)

<sup>c</sup> Data reported as mean (standard error)

\* between groups

Supplementary Table 6. Sedentary behaviour pre- and during lockdown

| Author                              | SB type and units of measurement                                                                                                                                                                                                                                                             | SB Pre-lockdown Mean (SD)                                                                                                                                                                             | SB During lockdown Mean (SD)                                                                                                                                                                        | Change                                                                                                                                  | P value (if applicable)                                                                                                                                                   |
|-------------------------------------|----------------------------------------------------------------------------------------------------------------------------------------------------------------------------------------------------------------------------------------------------------------------------------------------|-------------------------------------------------------------------------------------------------------------------------------------------------------------------------------------------------------|-----------------------------------------------------------------------------------------------------------------------------------------------------------------------------------------------------|-----------------------------------------------------------------------------------------------------------------------------------------|---------------------------------------------------------------------------------------------------------------------------------------------------------------------------|
| Ammar et al. (2020)                 | <i>Sitting time</i><br>Hours/Day                                                                                                                                                                                                                                                             | 5.3 (3.65)                                                                                                                                                                                            | 8.41 (5.11)                                                                                                                                                                                         | + 28.6%                                                                                                                                 | p < 0.001                                                                                                                                                                 |
| Asiamah et al (2020)                | <i>Sedentary behaviour - % participants</i><br>No time added/week<br>1-30 min added/week<br>30-59 min added/week<br>1-3hrs added/week<br>4-6hrs added/week<br>>6hrs added/week                                                                                                               | NR                                                                                                                                                                                                    | 18.4%<br>5.6%<br>7.9%<br>24.6%<br>24.2%<br>19.3%                                                                                                                                                    | NR                                                                                                                                      | NR                                                                                                                                                                        |
| Bivi-Roig et al (2020) <sup>b</sup> | <i>Sitting time</i><br>Hours/Day                                                                                                                                                                                                                                                             | 4 (4)                                                                                                                                                                                                 | 8 (5)                                                                                                                                                                                               | + 4                                                                                                                                     | p < 0.001                                                                                                                                                                 |
| Castaneda-Babarro Coca et al (2020) | <i>Sitting time (hours/day)</i><br>All participants<br>Women<br>Men<br>Workers<br>Students<br>Study-work<br>Nothing<br><br>(age categories)<br>18-24 years old<br>25-34 years old<br>35-44 years old<br>45-54 years old<br>55-65 years old<br><br>(Moderate PA categories)<br>0-150 min/week | 6.1 (3.6)<br>6.3 (3.9)<br>6.0 (3.1)<br>6.2 (3.5)<br>6.4 (2.4)<br>6.3 (4.1)<br>4.4 (2.4)<br><br>6.6 (4.2)<br>6.4 (3.1)<br>6.0 (3.9)<br>6.1 (3.1)<br>5.7 (3.0)<br><br>6.4 (3.6)<br>5.7 (3)<br>5.7 (4.4) | 8 (5.1)<br>7.9 (3.9)<br>8.1 (5.9)<br>8.0 (5.4)<br>8.8 (3.2)<br>8.3 (3.4)<br>6.5 (3.5)<br><br>9 (3.5)<br>8.6 (3.6)<br>7.7 (3.9)<br>7.9 (7.2)<br>7.5 (3.5)<br><br>8.2 (4.3)<br>8.1 (7.3)<br>7.6 (3.3) | + 1.9<br>+ 1.6<br>+ 2.1<br>+1.8<br>+2.4<br>+2.0<br>+2.1<br><br>+ 2.4<br>+ 2.2<br>+ 1.7<br>+ 1.8<br>+ 1.8<br><br>+ 1.8<br>+ 2.4<br>+ 1.9 | < 0.001<br>< 0.001<br>< 0.001<br>< 0.001<br>< 0.001<br>< 0.001<br>< 0.001<br><br>< 0.001<br>< 0.001<br>< 0.001<br>< 0.001<br>< 0.001<br><br>< 0.001<br>< 0.001<br>< 0.001 |



|                          |                                                                                                                                                                                                                                                                                                                                                                                   |                                                                                          |                                                                                            |                                                                                     |                                                         |
|--------------------------|-----------------------------------------------------------------------------------------------------------------------------------------------------------------------------------------------------------------------------------------------------------------------------------------------------------------------------------------------------------------------------------|------------------------------------------------------------------------------------------|--------------------------------------------------------------------------------------------|-------------------------------------------------------------------------------------|---------------------------------------------------------|
|                          | 150-300 min/week<br>300-450 min/week<br>>450 min/week<br><br>(Vigorous PA categories)<br>0-75 min/week<br>75-150 min/week<br>150-225 min/week<br>>225 min/week                                                                                                                                                                                                                    | 4.8 (2.9)<br><br>6.4 (3.2)<br>6.5 (4.3)<br>6.2 (3.1)<br>5.7 (3.3)                        | 6.5 (3.3)<br><br>7.9 (3.5)<br>8.0 (3.5)<br>8.2 (4.1)<br>8.0 (6.5)                          | + 1.7<br><br>+ 1.5<br>+ 1.5<br>+ 2.0<br>+2.3                                        | < 0.001<br><br>< 0.001<br>< 0.001<br>< 0.001<br>< 0.001 |
| Constandt et al (2020a)  | Screen watching - % participants<br>Decreased<br>Unchanged<br>Increased                                                                                                                                                                                                                                                                                                           | NR                                                                                       | NR                                                                                         | 3.6%<br>37%<br>59.0%                                                                | NR                                                      |
| Constandt et al. (2020b) | Sitting time - % of participants (active group)<br>Increased<br>Stayed the same<br>Decreased<br><br>Sitting time - % of participants (inactive group)<br>Increased<br>Stayed the same<br>Decreased                                                                                                                                                                                | NR                                                                                       | NR                                                                                         | 46%<br>39%<br>15%<br><br>40%<br>36%<br>24%                                          | NR                                                      |
| Dutta et al (2020)       | Phone screen time weekday - % participants<br>< 1 hour per day<br>1-2 hours per day<br>2-4 hours per day<br>4-8 hours per day<br>Not applicable<br><br>Phone screen time weekend day - % participants<br>< 1 hour per day<br>1-2 hours per day<br>2-4 hours per day<br>4-8 hours per day<br>Not applicable<br><br>Laptop screen time weekday - % participants<br>< 1 hour per day | 28.6%<br>25.7%<br>11.4%<br>5.7%<br>28.6%<br><br>31.4%<br>20.0%<br>17.1%<br>2.9%<br>28.6% | 28.6%<br>22.9%<br>11.4%<br>14.3%<br>22.9%<br><br>28.6%<br>22.9%<br>11.4%<br>14.3%<br>22.9% | 0<br>- 2.8<br>0<br>+ 8.6<br>- 5.7<br><br>- 2.8<br>+ 2.9<br>- 5.7<br>+ 11.4<br>- 5.7 | NR                                                      |

|  |                                                        |       |       |        |  |
|--|--------------------------------------------------------|-------|-------|--------|--|
|  | 1-2 hours per day                                      | 8.6%  | 17.1% | + 8.5  |  |
|  | 2-4 hours per day                                      | 5.7%  | 8.6%  | + 2.9  |  |
|  | 4-8 hours per day                                      | 5.8%  | 8.6%  | + 2.8  |  |
|  | Not applicable                                         | 54.3% | 48.6% |        |  |
|  | <i>Laptop screen time weekend day - % participants</i> |       |       |        |  |
|  | < 1 hour per day                                       | 17.1% | 17.1% | 0      |  |
|  | 1-2 hours per day                                      | 14.3% | 17.1% | + 2.8  |  |
|  | 2-4 hours per day                                      | 2.9%  | 8.6%  | + 5.7  |  |
|  | 4-8 hours per day                                      | 2.9%  | 8.6%  | + 5.7  |  |
|  | Not applicable                                         | 62.9% | 48.6% | - 14.3 |  |
|  | <i>TV screen time weekday - % participants</i>         |       |       |        |  |
|  | < 1 hour per day                                       | 34.3% | 20.0% | - 14.3 |  |
|  | 1-2 hours per day                                      | 31.4% | 25.8% | - 5.3  |  |
|  | 2-4 hours per day                                      | 0%    | 20.0% | + 20   |  |
|  | 4-8 hours per day                                      | 2.9%  | 8.6%  | + 5.7  |  |
|  | Not applicable                                         | 31.4% | 25.7% | - 5.7  |  |
|  | <i>TV screen time weekend day - % participants</i>     |       |       |        |  |
|  | < 1 hour per day                                       | 22.9% | 20.0% | - 2.9  |  |
|  | 1-2 hours per day                                      | 40.0% | 25.8% | - 14.2 |  |
|  | 2-4 hours per day                                      | 5.7%  | 20.0% | + 14.3 |  |
|  | 4-8 hours per day                                      | 2.9%  | 8.6%  | + 5.7  |  |
|  | Not applicable                                         | 28.6% | 25.7% | - 2.9  |  |
|  | <i>Tablet screen time weekday - % participants</i>     |       |       |        |  |
|  | < 1 hour per day                                       | 25.7% | 22.9% | - 2.8  |  |
|  | 1-2 hours per day                                      | 0%    | 2.9%  | + 2.9  |  |
|  | 2-4 hours per day                                      | 0%    | 0%    | 0      |  |
|  | 4-8 hours per day                                      | 2.9%  | 2.9%  | 0      |  |
|  | Not applicable                                         | 71.4% | 71.4% | 0      |  |
|  | <i>Tablet screen time weekend day - % participants</i> |       |       |        |  |
|  | < 1 hour per day                                       | 20.0% | 22.9% | + 2.9  |  |
|  | 1-2 hours per day                                      | 5.7%  | 2.9%  | - 2.8  |  |
|  | 2-4 hours per day                                      | 0%    | 0%    | 0      |  |
|  | 4-8 hours per day                                      | 0%    | 2.9%  | + 2.9  |  |
|  | Not applicable                                         | 74.3% | 71.4% | - 2.9  |  |

|                                 |                                                                   |            |            |         |          |
|---------------------------------|-------------------------------------------------------------------|------------|------------|---------|----------|
| Elran-Barak and Mozeikov (2020) | <i>Social media – hours/day</i>                                   | 3.2 (1.1)  | 3.9 (1.2)  | + 0.7   | < 0.001  |
|                                 | <i>Online health communities – hours/day</i>                      | 2 (0.7)    | 2.2 (0.9)  | + 0.2   | < 0.001  |
| Galle et al (2020b)             | <i>Sedentary time – min/day</i>                                   |            |            |         |          |
|                                 | Total <sup>b</sup>                                                | 240 (240)  | 480 (300)  | + 240   | NR       |
|                                 | Sedentary leisure activities                                      | 38.7       | 66.6       | + 27.9  | < 0.05   |
|                                 | Using electronic devices                                          | 65.3       | 177.7      | + 52.4  | < 0.05   |
|                                 | Watching TV/DVD                                                   | 71.7       | 119.3      | + 47.6  | < 0.05   |
|                                 | Eating                                                            | 82.3       | 106.5      | + 24.2  | < 0.05   |
| Studying/working                | 173.9                                                             | 210.7      | + 36.8     | < 0.05  |          |
| Husain and Ashkanani (2020)     | <i>Hours per day spent on computer/TV/mobile - % participants</i> |            |            |         | NR       |
|                                 | 1-2h per day                                                      | 30.4%      | 12.0%      | - 18.4% |          |
|                                 | 3-4h per day                                                      | 33.3%      | 19.0%      | - 14.3% |          |
|                                 | 5-6h per day                                                      | 30.2%      | 25.3%      | + 5.1%  |          |
|                                 | >6h per day                                                       | 16.1%      | 43.6%      | + 27.5% |          |
| Lopez-Bueno et al (2020b)       | <i>Screen time ≥2h/day - % participants</i>                       |            |            |         |          |
|                                 | 1 week of lockdown                                                | 83.3%      | 97.7%      | + 14.7% | < 0.001* |
|                                 | 2 weeks of lockdown                                               | 83.3%      | 96.9%      | + 13.9% |          |
|                                 | 3 weeks of lockdown                                               | 83.3%      | 98.7%      | + 15.7% |          |
| Majumdar et al (2020)           | <i>Change in screen time on cell phone – hours/day</i>            |            |            |         | NR       |
|                                 | Office workers                                                    | 3 (1.59)   | 4 (2.24)   | + 1.0   |          |
|                                 | Students                                                          | 3 (1.36)   | 5.2 (1.73) | + 2.2   |          |
|                                 | <i>Change in screen time on computer – hours/day</i>              |            |            |         |          |
|                                 | Office workers                                                    |            |            |         |          |
|                                 | Students                                                          |            |            |         |          |
|                                 | <i>Change in screen time TV – hours/day</i>                       |            |            |         |          |
|                                 | Office workers                                                    | 6.4 (2.9)  | 8.2 (3.36) | + 1.8   |          |
| Students                        | 1.3 (0.95)                                                        | 1.6 (1.75) | + 0.3      |         |          |
| Meyer et al. (2020)             | <i>Sitting time - % of population</i>                             |            |            |         |          |
|                                 | Previously active                                                 | NR         | NR         | +26.4%  | NR       |
|                                 | Previously inactive                                               |            |            | +16.0%  |          |
|                                 | <i>Screen time - % of population</i>                              |            |            |         |          |

|                         |                                                                                                                                                                                                                                                                                                                                                                                                                                                                                           |                 |                 |                        |         |
|-------------------------|-------------------------------------------------------------------------------------------------------------------------------------------------------------------------------------------------------------------------------------------------------------------------------------------------------------------------------------------------------------------------------------------------------------------------------------------------------------------------------------------|-----------------|-----------------|------------------------|---------|
|                         | Previously active<br>Previously inactive                                                                                                                                                                                                                                                                                                                                                                                                                                                  |                 |                 | +37.8%<br>+25.3%       |         |
| Mitra et al (2020)      | <p>Screen time - % participants</p> <p>(All participants)</p> <p>Decrease<br/>Same<br/>Increase</p> <p>(Children aged 5-11)</p> <p>Decrease<br/>Same<br/>Increase</p> <p>(Youth aged 12-17)</p> <p>Decrease<br/>Same<br/>Increase</p> <p>Non-screen sedentary time - % participants</p> <p>(All participants)</p> <p>Decrease<br/>Same<br/>Increase</p> <p>(Children aged 5-11)</p> <p>Decrease<br/>Same<br/>Increase</p> <p>(Youth aged 12-17)</p> <p>Decrease<br/>Same<br/>Increase</p> | NR              | NR              | 3.7%<br>17.5%<br>78.8% | NR      |
|                         |                                                                                                                                                                                                                                                                                                                                                                                                                                                                                           |                 |                 | 3.8%<br>18.3%<br>77.9% |         |
|                         |                                                                                                                                                                                                                                                                                                                                                                                                                                                                                           |                 |                 | 3.6%<br>16.9%<br>79.5% |         |
|                         |                                                                                                                                                                                                                                                                                                                                                                                                                                                                                           |                 |                 | 7.2%<br>44.2%<br>48.6% |         |
|                         |                                                                                                                                                                                                                                                                                                                                                                                                                                                                                           |                 |                 | 6.8%<br>35.5%<br>57.7% |         |
|                         |                                                                                                                                                                                                                                                                                                                                                                                                                                                                                           |                 |                 | 7.6%<br>51.9%<br>40.6% |         |
| Mon-Lopez et al (2020b) | Screen time – min/day                                                                                                                                                                                                                                                                                                                                                                                                                                                                     |                 |                 |                        |         |
|                         | TV time                                                                                                                                                                                                                                                                                                                                                                                                                                                                                   | 79.54 (69.11)   | 152.88 (126.98) | + 73.34                | < 0.001 |
|                         | PC time                                                                                                                                                                                                                                                                                                                                                                                                                                                                                   | 206.69 (170.33) | 265.97 (197.84) | + 59.28                | < 0.001 |
|                         | Phone time                                                                                                                                                                                                                                                                                                                                                                                                                                                                                | 149.41 (123.29) | 205.92 (162.18) | + 56.51                | < 0.001 |
|                         | Total screen time                                                                                                                                                                                                                                                                                                                                                                                                                                                                         | 433.29 (225.66) | 326.97 (319.79) | + 190.68               | < 0.001 |

|                            |                                                                                                                                |                 |                                                                                                                                                                                                                                                                                                                                               |                                                          |           |
|----------------------------|--------------------------------------------------------------------------------------------------------------------------------|-----------------|-----------------------------------------------------------------------------------------------------------------------------------------------------------------------------------------------------------------------------------------------------------------------------------------------------------------------------------------------|----------------------------------------------------------|-----------|
| Munasinghe et al (2020)    | Watching TV - Yes/No<br>Watched TV                                                                                             | 55.4%           | 52.1%                                                                                                                                                                                                                                                                                                                                         | - 3.3%                                                   | NR        |
| Pietrobelli et al. (2020)  | Screen time<br>Hours/day                                                                                                       | 2.76 (1.64)     | 7.61 (2.13)                                                                                                                                                                                                                                                                                                                                   | + 4.85 (2.40)                                            | p < 0.001 |
| Robinson et al (2020)      | Time spent sitting down - % participants<br>A lot less<br>Less<br>A little less<br>Same<br>A little more<br>More<br>A lot more | NR              | NR                                                                                                                                                                                                                                                                                                                                            | 1.0%<br>2.0%<br>5.0%<br>20.0%<br>20.0%<br>28.0%<br>25.0% | NR        |
| Romero-Blanco et al (2020) | Daily sitting time<br>Min/day                                                                                                  | 418.59 (201.58) | 525.35 (194.57)                                                                                                                                                                                                                                                                                                                               | + 106.76                                                 | < 0.001   |
| Ruiz-Roso et al (2020a)    | Sitting time                                                                                                                   | NR              | In text - 'During the COVID-19 lockdown, we noticed a significant increase in the daily hours that the participants of the study were sitting without doing any physical activity at all (Figure 5). Regarding the average minutes per week spent walking, we observed a significant decrease during lockdown compared to the period before.' | NR                                                       | <0.0001   |
| Sanudo et al (2020)        | Sitting time<br>Hours/day                                                                                                      | 6.4 (2.6)       | 9.7 (2.9)                                                                                                                                                                                                                                                                                                                                     | + 3.3                                                    | 0.002     |

|                                 |                                                                                                                                                                                                                                                                                                                                                                                                                                                                                  |                                                                                          |                                                                                                                                                                      |                                                                                                  |                                                                                                                                         |
|---------------------------------|----------------------------------------------------------------------------------------------------------------------------------------------------------------------------------------------------------------------------------------------------------------------------------------------------------------------------------------------------------------------------------------------------------------------------------------------------------------------------------|------------------------------------------------------------------------------------------|----------------------------------------------------------------------------------------------------------------------------------------------------------------------|--------------------------------------------------------------------------------------------------|-----------------------------------------------------------------------------------------------------------------------------------------|
| Savage et al (2020)             | <i>Sedentary behaviour</i>                                                                                                                                                                                                                                                                                                                                                                                                                                                       | NR                                                                                       | In text - 'Sedentary behaviour was greater at T4 compared to T1, T2 and T3 (Bonferroni post hoc test, P < .0001), and was greater at T3 compared to T1 (P < .0001).' | NR                                                                                               | NR                                                                                                                                      |
| Srivastav et al (2020)          | <i>SB – MET-min/week</i><br>Sitting                                                                                                                                                                                                                                                                                                                                                                                                                                              | 332.9                                                                                    | 1255.3                                                                                                                                                               | + 922.4                                                                                          | < 0.001                                                                                                                                 |
| Yang et al (2020a) <sup>b</sup> | <i>Screen time – hours/day</i><br>High School Students (< 18 years old)<br>Undergraduate Students<br>Graduate students<br>All participants<br><br><i>Sedentary time on weekdays – hours/day</i><br>High School Students (< 18 years old)<br>Undergraduate Students<br>Graduate students<br>All participants<br><br><i>Sedentary time on weekend days – hours/day</i><br>High School Students (< 18 years old)<br>Undergraduate Students<br>Graduate students<br>All participants | 4.0<br>4.0<br>5.0<br>4.0<br><br>3.3<br>4.0<br>6.0<br>4.0<br><br>3.4<br>4.0<br>5.0<br>4.0 | 5.0<br>5.0<br>5.0<br>5.0<br><br>4.0<br>5.0<br>6.0<br>4.5<br><br>4.0<br>5.0<br>6.0<br>4.5                                                                             | + 1<br>+ 1<br>0<br>+ 1<br><br>+ 0.7<br>+ 1<br>0<br>+ 0.5<br><br>+ 0.6<br>+ 1.0<br>+ 1.0<br>+ 0.5 | < 0.001<br>< 0.001<br>< 0.001<br>< 0.001<br><br>< 0.001<br>< 0.001<br>< 0.01<br>< 0.001<br><br>< 0.001<br>< 0.001<br>< 0.001<br>< 0.001 |
| Yang et al (2020b)              | <i>Sedentary time</i><br>Min/day                                                                                                                                                                                                                                                                                                                                                                                                                                                 | 367.99 (167.01)                                                                          | 369.55 (152.85)                                                                                                                                                      | + 1.56                                                                                           | 0.85                                                                                                                                    |
| Wang et al (2020)               | <i>Sitting time increased</i><br>% participants<br><br><i>Lying down time increased</i><br>% participants                                                                                                                                                                                                                                                                                                                                                                        | NR                                                                                       | NR                                                                                                                                                                   | 67%<br><br>61%                                                                                   | NR                                                                                                                                      |

NR, Not reported; TV, television; DVD, digital video disc;

<sup>b</sup>Data reported as median (interquartile range)

\* between groups
